# Supplementary material for: Polysaccharide fromPleurotus tuber-regiummycelium improves DSS-induced colitis in mice by regulating inflammatory cytokines, oxidative stress and gut microbiota
Source: Royal Society of Chemistry journal article supplement (doi:10.1039/d3fo05583c), 2024-01-01
Supplement: d3fo05583c1.xlsx [file d3fo05583c1.xlsx]

## Sheet: molecular weight
Retention time (min)	Response (mV)	Molecular weight（Da）
3.43	0	21796641
3.45	0	21286586
3.47	0	20788467
3.48	0	20302004
3.5	0	19826924
3.52	0	19362962
3.53	0	18909857
3.55	0	18467354
3.57	0	18035207
3.58	0.06	17613172
3.6	0.19	17201013
3.62	0.4	16798499
3.63	0.77	16405404
3.65	1.35	16021507
3.67	2.28	15646594
3.68	3.48	15280454
3.7	5.09	14922882
3.72	7.11	14573677
3.73	9.59	14232644
3.75	12.5	13899592
3.77	15.81	13574333
3.78	19.51	13256685
3.8	23.59	12946470
3.82	28.02	12643515
3.83	32.82	12347649
3.85	37.91	12058706
3.87	43.35	11776525
3.88	49.07	11500947
3.9	55.11	11231818
3.92	61.51	10968986
3.93	68.21	10712305
3.95	75.24	10461631
3.97	82.57	10216822
3.98	90.2	9977742
4	98.18	9744257
4.02	106.47	9516235
4.03	115.07	9293550
4.05	123.94	9076075
4.07	133.06	8863689
4.08	142.38	8656273
4.1	151.84	8453711
4.12	161.38	8255889
4.13	170.85	8062696
4.15	180.16	7874024
4.17	189.14	7689767
4.18	197.67	7509822
4.2	205.51	7334087
4.22	212.51	7162465
4.23	218.53	6994859
4.25	223.3	6831175
4.27	226.85	6671321
4.28	229.06	6515208
4.3	229.87	6362749
4.32	229.37	6213856
4.33	227.61	6068448
4.35	224.76	5926443
4.37	220.98	5787760
4.38	216.46	5652323
4.4	211.37	5520055
4.42	205.91	5390883
4.43	200.16	5264733
4.45	194.29	5141535
4.47	188.36	5021220
4.48	182.45	4903720
4.5	176.67	4788970
4.52	171.03	4676905
4.53	165.57	4567463
4.55	160.32	4460581
4.57	155.24	4356201
4.58	150.37	4254263
4.6	145.7	4154711
4.62	141.26	4057488
4.63	137.05	3962540
4.65	133.02	3869814
4.67	129.26	3779258
4.68	125.72	3690821
4.7	122.36	3604454
4.72	119.2	3520107
4.73	116.25	3437735
4.75	113.48	3357289
4.77	110.9	3278727
4.78	108.44	3202003
4.8	106.06	3127074
4.82	103.79	3053898
4.83	101.63	2982435
4.85	99.5	2912644
4.87	97.51	2844487
4.88	95.63	2777924
4.9	93.79	2712919
4.92	91.98	2649435
4.93	90.21	2587436
4.95	88.51	2526889
4.97	86.86	2467758
4.98	85.25	2410011
5	83.7	2353615
5.02	82.23	2298539
5.03	80.77	2244752
5.05	79.34	2192223
5.07	77.95	2140924
5.08	76.63	2090825
5.1	75.34	2041898
5.12	74.09	1994117
5.13	72.87	1947453
5.15	71.67	1901881
5.17	70.53	1857376
5.18	69.41	1813913
5.2	68.3	1771466
5.22	67.22	1730012
5.23	66.15	1689529
5.25	65.11	1649993
5.27	64.1	1611382
5.28	63.14	1573675
5.3	62.19	1536850
5.32	61.22	1500887
5.33	60.27	1465765
5.35	59.31	1431465
5.37	58.37	1397968
5.38	57.44	1365255
5.4	56.52	1333307
5.42	55.6	1302107
5.43	54.68	1271637
5.45	53.81	1241879
5.47	52.93	1212819
5.48	52.05	1184438
5.5	51.16	1156721
5.52	50.31	1129653
5.53	49.46	1103219
5.55	48.62	1077403
5.57	47.79	1052191
5.58	46.98	1027569
5.6	46.18	1003523
5.62	45.39	980040
5.63	44.62	957107
5.65	43.9	934710
5.67	43.2	912837
5.68	42.52	891476
5.7	41.82	870615
5.72	41.19	850242
5.73	40.65	830346
5.75	40.12	810915
5.77	39.63	791939
5.78	39.18	773407
5.8	38.75	755309
5.82	38.38	737634
5.83	38.04	720373
5.85	37.72	703516
5.87	37.45	687053
5.88	37.24	670976
5.9	37.04	655275
5.92	36.86	639941
5.93	36.73	624966
5.95	36.6	610341
5.97	36.49	596059
5.98	36.39	582111
6	36.33	568489
6.02	36.27	555186
6.03	36.2	542194
6.05	36.17	529506
6.07	36.21	517116
6.08	36.35	505015
6.1	36.57	493197
6.12	36.96	481656
6.13	37.61	470385
6.15	38.64	459378
6.17	40.08	448628
6.18	41.83	438130
6.2	43.72	427877
6.22	45.36	417865
6.23	46.3	408086
6.25	46.13	398537
6.27	44.55	389211
6.28	41.61	380103
6.3	37.7	371208
6.32	33.42	362522
6.33	29.29	354039
6.35	25.59	345754
6.37	22.36	337663
6.38	20.02	329762
6.4	18.09	322045
6.42	16.41	314509
6.43	14.95	307149
6.45	13.7	299962
6.47	12.64	292942
6.48	11.73	286087
6.5	10.97	279393
6.52	10.31	272855
6.53	9.73	266470
6.55	9.23	260234
6.57	8.81	254144
6.58	8.45	248197
6.6	8.14	242389
6.62	7.89	236717
6.63	7.67	231178
6.65	7.49	225768
6.67	7.31	220485
6.68	7.14	215326
6.7	6.93	210287
6.72	6.65	205366
6.73	6.32	200560
6.75	5.98	195867
6.77	5.61	191284
6.78	5.21	186807
6.8	4.84	182436
6.82	4.48	178167
6.83	4.15	173998
6.85	3.86	169926
6.87	3.6	165950
6.88	3.36	162066
6.9	3.1	158274
6.92	2.81	154570
6.93	2.48	150953
6.95	2.1	147421
6.97	1.69	143971
6.98	1.29	140602
7	0.94	137312
7.02	0.63	134099
7.03	0.37	130961
7.05	0.13	127896
7.07	0	124903
7.08	0	121980
7.1	0	119126
7.12	0	116338
7.13	0	113616
7.15	0	110957
7.17	0	108361
7.18	0	105825
7.2	0	103349
7.22	0	100930
7.23	0	98568
7.25	0	96262
20	0

## Sheet: monosaccharide
Time（min）	Response（nC）
0.0003	-0.0018
0.0087	0.0061
0.017	0.0066
0.0253	0.0052
0.0337	0.0051
0.042	0.0036
0.0503	0.0005
0.0587	-0.0045
0.067	-0.0078
0.0753	-0.0112
0.0837	-0.015
0.092	-0.0177
0.1003	-0.0212
0.1087	-0.0284
0.117	-0.0305
0.1253	-0.0323
0.1337	-0.0337
0.142	-0.0349
0.1503	-0.0388
0.1587	-0.0453
0.167	-0.0477
0.1753	-0.05
0.1837	-0.0518
0.192	-0.0522
0.2003	-0.0549
0.2087	-0.0555
0.217	-0.0562
0.2253	-0.0563
0.2337	-0.0559
0.242	-0.0561
0.2503	-0.0578
0.2587	-0.0612
0.267	-0.0626
0.2753	-0.0638
0.2837	-0.0682
0.292	-0.073
0.3003	-0.0739
0.3087	-0.0741
0.317	-0.0758
0.3253	-0.0777
0.3337	-0.0807
0.342	-0.086
0.3503	-0.0906
0.3587	-0.0924
0.367	-0.0952
0.3753	-0.097
0.3837	-0.0985
0.392	-0.0994
0.4003	-0.1006
0.4087	-0.1022
0.417	-0.1029
0.4253	-0.1048
0.4337	-0.106
0.442	-0.1071
0.4503	-0.1088
0.4587	-0.1111
0.467	-0.1131
0.4753	-0.117
0.4837	-0.1191
0.492	-0.1197
0.5003	-0.1213
0.5087	-0.1237
0.517	-0.1269
0.5253	-0.1316
0.5337	-0.1366
0.542	-0.1389
0.5503	-0.1408
0.5587	-0.1432
0.567	-0.1439
0.5753	-0.1467
0.5837	-0.1476
0.592	-0.148
0.6003	-0.1487
0.6087	-0.1481
0.617	-0.1488
0.6253	-0.1508
0.6337	-0.1533
0.642	-0.1546
0.6503	-0.1568
0.6587	-0.1599
0.667	-0.1638
0.6753	-0.1647
0.6837	-0.1658
0.692	-0.1679
0.7003	-0.1697
0.7087	-0.1729
0.717	-0.1784
0.7253	-0.1819
0.7337	-0.1848
0.742	-0.1863
0.7503	-0.1881
0.7587	-0.1885
0.767	-0.1901
0.7753	-0.1911
0.7837	-0.1912
0.792	-0.1922
0.8003	-0.1931
0.8087	-0.1943
0.817	-0.1956
0.8253	-0.1974
0.8337	-0.1994
0.842	-0.2011
0.8503	-0.2051
0.8587	-0.2064
0.867	-0.2071
0.8753	-0.2084
0.8837	-0.2098
0.892	-0.2139
0.9003	-0.2185
0.9087	-0.223
0.917	-0.2256
0.9253	-0.2271
0.9337	-0.2284
0.942	-0.2296
0.9503	-0.2308
0.9587	-0.2317
0.967	-0.2334
0.9753	-0.2344
0.9837	-0.2338
0.992	-0.2348
1.0003	-0.2364
1.0087	-0.2381
1.017	-0.24
1.0253	-0.242
1.0337	-0.2465
1.042	-0.2485
1.0503	-0.249
1.0587	-0.2501
1.067	-0.2523
1.0753	-0.2551
1.0837	-0.2598
1.092	-0.2652
1.1003	-0.2687
1.1087	-0.2708
1.117	-0.2721
1.1253	-0.2745
1.1337	-0.2756
1.142	-0.2764
1.1503	-0.2766
1.1587	-0.2754
1.167	-0.2742
1.1753	-0.2713
1.1837	-0.2674
1.192	-0.2604
1.2003	-0.2498
1.2087	-0.2379
1.217	-0.2263
1.2253	-0.2136
1.2337	-0.1973
1.242	-0.1817
1.2503	-0.1697
1.2587	-0.1614
1.267	-0.1544
1.2753	-0.1407
1.2837	-0.1091
1.292	-0.0638
1.3003	-0.0173
1.3087	0.0156
1.317	0.0231
1.3253	0.0082
1.3337	-0.0204
1.342	-0.0499
1.3503	-0.0705
1.3587	-0.0714
1.367	-0.0244
1.3753	0.1356
1.3837	0.496
1.392	1.0629
1.4003	1.7005
1.4087	2.2128
1.417	2.4667
1.4253	2.4367
1.4337	2.1816
1.442	1.8025
1.4503	1.3957
1.4587	1.0254
1.467	0.7323
1.4753	0.5371
1.4837	0.4731
1.492	0.576
1.5003	0.8508
1.5087	1.2369
1.517	1.6445
1.5253	1.98
1.5337	2.1825
1.542	2.2374
1.5503	2.1741
1.5587	2.0403
1.567	1.885
1.5753	1.7446
1.5837	1.6361
1.592	1.5657
1.6003	1.5344
1.6087	1.5392
1.617	1.5714
1.6253	1.6237
1.6337	1.6927
1.642	1.7714
1.6503	1.8606
1.6587	1.9588
1.667	2.062
1.6753	2.169
1.6837	2.2763
1.692	2.3821
1.7003	2.485
1.7087	2.5849
1.717	2.6793
1.7253	2.7661
1.7337	2.8443
1.742	2.9177
1.7503	2.9848
1.7587	3.0473
1.767	3.1067
1.7753	3.168
1.7837	3.2254
1.792	3.282
1.8003	3.3315
1.8087	3.3714
1.817	3.4012
1.8253	3.422
1.8337	3.4387
1.842	3.4583
1.8503	3.4835
1.8587	3.5073
1.867	3.5226
1.8753	3.5194
1.8837	3.4921
1.892	3.4402
1.9003	3.3696
1.9087	3.2875
1.917	3.2021
1.9253	3.1179
1.9337	3.0352
1.942	2.9594
1.9503	2.8879
1.9587	2.817
1.967	2.7433
1.9753	2.6754
1.9837	2.6083
1.992	2.5426
2.0003	2.4774
2.0087	2.413
2.017	2.3487
2.0253	2.2867
2.0337	2.2291
2.042	2.1718
2.0503	2.1167
2.0587	2.0618
2.067	2.01
2.0753	1.9652
2.0837	1.9272
2.092	1.897
2.1003	1.8682
2.1087	1.8374
2.117	1.8023
2.1253	1.7559
2.1337	1.6956
2.142	1.6264
2.1503	1.5465
2.1587	1.465
2.167	1.385
2.1753	1.3071
2.1837	1.2326
2.192	1.1612
2.2003	1.0923
2.2087	1.0284
2.217	0.9685
2.2253	0.9137
2.2337	0.8624
2.242	0.814
2.2503	0.7667
2.2587	0.7209
2.267	0.676
2.2753	0.633
2.2837	0.5918
2.292	0.5514
2.3003	0.5138
2.3087	0.4796
2.317	0.4494
2.3253	0.4228
2.3337	0.3967
2.342	0.3705
2.3503	0.3502
2.3587	0.3287
2.367	0.3057
2.3753	0.2808
2.3837	0.2519
2.392	0.2188
2.4003	0.1851
2.4087	0.153
2.417	0.1217
2.4253	0.0948
2.4337	0.0766
2.442	0.0737
2.4503	0.096
2.4587	0.1508
2.467	0.2459
2.4753	0.3784
2.4837	0.54
2.492	0.7146
2.5003	0.8816
2.5087	1.0224
2.517	1.1219
2.5253	1.1716
2.5337	1.1749
2.542	1.1371
2.5503	1.0661
2.5587	0.9721
2.567	0.8656
2.5753	0.7514
2.5837	0.6389
2.592	0.5331
2.6003	0.4358
2.6087	0.3479
2.617	0.2688
2.6253	0.1992
2.6337	0.1368
2.642	0.0809
2.6503	0.0296
2.6587	-0.0183
2.667	-0.0628
2.6753	-0.1053
2.6837	-0.1444
2.692	-0.1803
2.7003	-0.2115
2.7087	-0.2374
2.717	-0.2591
2.7253	-0.2718
2.7337	-0.2809
2.742	-0.2886
2.7503	-0.2936
2.7587	-0.2997
2.767	-0.3061
2.7753	-0.3109
2.7837	-0.3148
2.792	-0.3174
2.8003	-0.3203
2.8087	-0.3217
2.817	-0.3233
2.8253	-0.3222
2.8337	-0.3201
2.842	-0.3183
2.8503	-0.316
2.8587	-0.3134
2.867	-0.311
2.8753	-0.3082
2.8837	-0.3065
2.892	-0.3065
2.9003	-0.3092
2.9087	-0.3099
2.917	-0.311
2.9253	-0.3129
2.9337	-0.3181
2.942	-0.3247
2.9503	-0.3337
2.9587	-0.3431
2.967	-0.3508
2.9753	-0.3578
2.9837	-0.3639
2.992	-0.3711
3.0003	-0.3779
3.0087	-0.3861
3.017	-0.3928
3.0253	-0.4005
3.0337	-0.4078
3.042	-0.4163
3.0503	-0.4236
3.0587	-0.4311
3.067	-0.4398
3.0753	-0.4481
3.0837	-0.4588
3.092	-0.4674
3.1003	-0.4717
3.1087	-0.4778
3.117	-0.4829
3.1253	-0.4876
3.1337	-0.4932
3.142	-0.4974
3.1503	-0.4988
3.1587	-0.4996
3.167	-0.4991
3.1753	-0.4995
3.1837	-0.4992
3.192	-0.5
3.2003	-0.5002
3.2087	-0.4988
3.217	-0.4942
3.2253	-0.4841
3.2337	-0.4616
3.242	-0.4243
3.2503	-0.3627
3.2587	-0.2719
3.267	-0.1516
3.2753	0.0008
3.2837	0.1857
3.292	0.3912
3.3003	0.6045
3.3087	0.8123
3.317	0.9972
3.3253	1.1465
3.3337	1.253
3.342	1.3121
3.3503	1.3205
3.3587	1.2855
3.367	1.2118
3.3753	1.1107
3.3837	0.9917
3.392	0.8651
3.4003	0.7363
3.4087	0.6118
3.417	0.4947
3.4253	0.3887
3.4337	0.2952
3.442	0.2113
3.4503	0.136
3.4587	0.0685
3.467	0.0084
3.4753	-0.0458
3.4837	-0.0966
3.492	-0.1437
3.5003	-0.19
3.5087	-0.2325
3.517	-0.2696
3.5253	-0.2989
3.5337	-0.3199
3.542	-0.3304
3.5503	-0.3281
3.5587	-0.3116
3.567	-0.2801
3.5753	-0.2345
3.5837	-0.1797
3.592	-0.1212
3.6003	-0.062
3.6087	-0.0107
3.617	0.025
3.6253	0.0415
3.6337	0.0392
3.642	0.0121
3.6503	-0.0333
3.6587	-0.0897
3.667	-0.1543
3.6753	-0.2231
3.6837	-0.291
3.692	-0.3575
3.7003	-0.419
3.7087	-0.4694
3.717	-0.5118
3.7253	-0.5465
3.7337	-0.5734
3.742	-0.5957
3.7503	-0.6143
3.7587	-0.6284
3.767	-0.6399
3.7753	-0.649
3.7837	-0.657
3.792	-0.6649
3.8003	-0.6696
3.8087	-0.6725
3.817	-0.6749
3.8253	-0.6771
3.8337	-0.679
3.842	-0.6779
3.8503	-0.6763
3.8587	-0.676
3.867	-0.6768
3.8753	-0.6804
3.8837	-0.6877
3.892	-0.6944
3.9003	-0.7011
3.9087	-0.7071
3.917	-0.7147
3.9253	-0.7234
3.9337	-0.7308
3.942	-0.739
3.9503	-0.7446
3.9587	-0.7513
3.967	-0.7575
3.9753	-0.7633
3.9837	-0.7679
3.992	-0.7724
4.0003	-0.7762
4.0087	-0.7807
4.017	-0.7876
4.0253	-0.7902
4.0337	-0.7919
4.042	-0.7947
4.0503	-0.797
4.0587	-0.8001
4.067	-0.8064
4.0753	-0.812
4.0837	-0.8156
4.092	-0.8193
4.1003	-0.8221
4.1087	-0.825
4.117	-0.8278
4.1253	-0.8313
4.1337	-0.8329
4.142	-0.8353
4.1503	-0.8367
4.1587	-0.8394
4.167	-0.8425
4.1753	-0.8453
4.1837	-0.8483
4.192	-0.8515
4.2003	-0.8555
4.2087	-0.8605
4.217	-0.8621
4.2253	-0.8645
4.2337	-0.8679
4.242	-0.8713
4.2503	-0.8774
4.2587	-0.8841
4.267	-0.8884
4.2753	-0.891
4.2837	-0.8935
4.292	-0.8943
4.3003	-0.896
4.3087	-0.8972
4.317	-0.8987
4.3253	-0.8991
4.3337	-0.9002
4.342	-0.9013
4.3503	-0.9031
4.3587	-0.9036
4.367	-0.9038
4.3753	-0.9057
4.3837	-0.9076
4.392	-0.9093
4.4003	-0.9075
4.4087	-0.9033
4.417	-0.8966
4.4253	-0.8863
4.4337	-0.8695
4.442	-0.8447
4.4503	-0.806
4.4587	-0.7503
4.467	-0.6766
4.4753	-0.5837
4.4837	-0.4698
4.492	-0.338
4.5003	-0.1915
4.5087	-0.0359
4.517	0.12
4.5253	0.268
4.5337	0.4024
4.542	0.5141
4.5503	0.5929
4.5587	0.6381
4.567	0.6472
4.5753	0.616
4.5837	0.5542
4.592	0.4645
4.6003	0.3544
4.6087	0.2287
4.617	0.0942
4.6253	-0.0437
4.6337	-0.1781
4.642	-0.3034
4.6503	-0.4159
4.6587	-0.5148
4.667	-0.6007
4.6753	-0.6735
4.6837	-0.7348
4.692	-0.7848
4.7003	-0.8257
4.7087	-0.8603
4.717	-0.8882
4.7253	-0.9111
4.7337	-0.9284
4.742	-0.9431
4.7503	-0.9564
4.7587	-0.9681
4.767	-0.9775
4.7753	-0.9836
4.7837	-0.9891
4.792	-0.9944
4.8003	-1.0007
4.8087	-1.0089
4.817	-1.0165
4.8253	-1.021
4.8337	-1.0267
4.842	-1.0303
4.8503	-1.0344
4.8587	-1.0383
4.867	-1.0424
4.8753	-1.0448
4.8837	-1.0484
4.892	-1.0534
4.9003	-1.0587
4.9087	-1.0619
4.917	-1.0642
4.9253	-1.0675
4.9337	-1.0696
4.942	-1.0729
4.9503	-1.0792
4.9587	-1.0815
4.967	-1.0841
4.9753	-1.0872
4.9837	-1.0903
4.992	-1.0949
5.0003	-1.1008
5.0087	-1.1069
5.017	-1.11
5.0253	-1.1141
5.0337	-1.1167
5.042	-1.1192
5.0503	-1.1221
5.0587	-1.1254
5.067	-1.1271
5.0753	-1.1287
5.0837	-1.1319
5.092	-1.1359
5.1003	-1.1401
5.1087	-1.1418
5.117	-1.144
5.1253	-1.1476
5.1337	-1.1527
5.142	-1.1551
5.1503	-1.1563
5.1587	-1.1578
5.167	-1.1606
5.1753	-1.1641
5.1837	-1.1686
5.192	-1.1736
5.2003	-1.1752
5.2087	-1.1771
5.217	-1.178
5.2253	-1.1773
5.2337	-1.1781
5.242	-1.1784
5.2503	-1.1782
5.2587	-1.1769
5.267	-1.1784
5.2753	-1.1801
5.2837	-1.1802
5.292	-1.1799
5.3003	-1.1801
5.3087	-1.1809
5.317	-1.1835
5.3253	-1.1875
5.3337	-1.1889
5.342	-1.1896
5.3503	-1.1929
5.3587	-1.1959
5.367	-1.2025
5.3753	-1.2087
5.3837	-1.2144
5.392	-1.2185
5.4003	-1.2227
5.4087	-1.2269
5.417	-1.2314
5.4253	-1.2361
5.4337	-1.2401
5.442	-1.2449
5.4503	-1.249
5.4587	-1.2533
5.467	-1.2579
5.4753	-1.2634
5.4837	-1.2677
5.492	-1.2718
5.5003	-1.2777
5.5087	-1.2843
5.517	-1.2883
5.5253	-1.2912
5.5337	-1.2943
5.542	-1.2986
5.5503	-1.3041
5.5587	-1.3109
5.567	-1.3171
5.5753	-1.3218
5.5837	-1.3249
5.592	-1.3272
5.6003	-1.3288
5.6087	-1.3313
5.617	-1.3323
5.6253	-1.3335
5.6337	-1.3352
5.642	-1.3398
5.6503	-1.3424
5.6587	-1.3446
5.667	-1.3466
5.6753	-1.3487
5.6837	-1.3524
5.692	-1.3581
5.7003	-1.3603
5.7087	-1.3616
5.717	-1.3634
5.7253	-1.3675
5.7337	-1.3716
5.742	-1.3786
5.7503	-1.3847
5.7587	-1.389
5.767	-1.393
5.7753	-1.395
5.7837	-1.3973
5.792	-1.3993
5.8003	-1.4018
5.8087	-1.4028
5.817	-1.4047
5.8253	-1.407
5.8337	-1.4092
5.842	-1.4108
5.8503	-1.4129
5.8587	-1.4154
5.867	-1.4182
5.8753	-1.421
5.8837	-1.4268
5.892	-1.4283
5.9003	-1.4296
5.9087	-1.4322
5.917	-1.4346
5.9253	-1.4398
5.9337	-1.4463
5.942	-1.4506
5.9503	-1.4546
5.9587	-1.4578
5.967	-1.4599
5.9753	-1.4623
5.9837	-1.4648
5.992	-1.4675
6.0003	-1.4688
6.0087	-1.471
6.017	-1.473
6.0253	-1.4766
6.0337	-1.4807
6.042	-1.4832
6.0503	-1.4855
6.0587	-1.4899
6.067	-1.4954
6.0753	-1.4985
6.0837	-1.5001
6.092	-1.5024
6.1003	-1.5061
6.1087	-1.5102
6.117	-1.5169
6.1253	-1.5225
6.1337	-1.5261
6.142	-1.5296
6.1503	-1.5308
6.1587	-1.5328
6.167	-1.534
6.1753	-1.5359
6.1837	-1.5371
6.192	-1.5387
6.2003	-1.542
6.2087	-1.5444
6.217	-1.546
6.2253	-1.5483
6.2337	-1.5514
6.242	-1.5535
6.2503	-1.5582
6.2587	-1.5624
6.267	-1.5637
6.2753	-1.5661
6.2837	-1.5691
6.292	-1.5726
6.3003	-1.5793
6.3087	-1.585
6.317	-1.5889
6.3253	-1.5914
6.3337	-1.5943
6.342	-1.5959
6.3503	-1.5991
6.3587	-1.6013
6.367	-1.6026
6.3753	-1.6041
6.3837	-1.6053
6.392	-1.6055
6.4003	-1.6078
6.4087	-1.6105
6.417	-1.6115
6.4253	-1.6136
6.4337	-1.6175
6.442	-1.6223
6.4503	-1.6239
6.4587	-1.6244
6.467	-1.6264
6.4753	-1.6285
6.4837	-1.6331
6.492	-1.6387
6.5003	-1.6436
6.5087	-1.6461
6.517	-1.6494
6.5253	-1.6523
6.5337	-1.6524
6.542	-1.6546
6.5503	-1.6563
6.5587	-1.6574
6.567	-1.6579
6.5753	-1.6607
6.5837	-1.6628
6.592	-1.6629
6.6003	-1.6644
6.6087	-1.6657
6.617	-1.6665
6.6253	-1.6685
6.6337	-1.667
6.642	-1.663
6.6503	-1.6575
6.6587	-1.6499
6.667	-1.6385
6.6753	-1.6234
6.6837	-1.601
6.692	-1.5678
6.7003	-1.5206
6.7087	-1.4596
6.717	-1.38
6.7253	-1.2782
6.7337	-1.1506
6.742	-0.9911
6.7503	-0.7973
6.7587	-0.566
6.767	-0.2922
6.7753	0.0262
6.7837	0.3908
6.792	0.8024
6.8003	1.2618
6.8087	1.7646
6.817	2.3052
6.8253	2.879
6.8337	3.4762
6.842	4.0853
6.8503	4.6961
6.8587	5.2954
6.867	5.8682
6.8753	6.4025
6.8837	6.8858
6.892	7.305
6.9003	7.6512
6.9087	7.916
6.917	8.0943
6.9253	8.1826
6.9337	8.1815
6.942	8.0946
6.9503	7.923
6.9587	7.6737
6.967	7.3555
6.9753	6.9758
6.9837	6.5461
6.992	6.0788
7.0003	5.5746
7.0087	5.0543
7.017	4.5257
7.0253	3.9976
7.0337	3.4767
7.042	2.9723
7.0503	2.4845
7.0587	2.0249
7.067	1.597
7.0753	1.2013
7.0837	0.841
7.092	0.5158
7.1003	0.2251
7.1087	-0.033
7.117	-0.2591
7.1253	-0.4569
7.1337	-0.6287
7.142	-0.7765
7.1503	-0.9043
7.1587	-1.013
7.167	-1.1067
7.1753	-1.1866
7.1837	-1.2556
7.192	-1.314
7.2003	-1.3607
7.2087	-1.4018
7.217	-1.437
7.2253	-1.4675
7.2337	-1.4969
7.242	-1.5209
7.2503	-1.5405
7.2587	-1.5574
7.267	-1.5717
7.2753	-1.5843
7.2837	-1.5964
7.292	-1.6068
7.3003	-1.6148
7.3087	-1.6217
7.317	-1.6287
7.3253	-1.6353
7.3337	-1.642
7.342	-1.6482
7.3503	-1.6531
7.3587	-1.6588
7.367	-1.667
7.3753	-1.6748
7.3837	-1.6793
7.392	-1.6836
7.4003	-1.6899
7.4087	-1.6968
7.417	-1.7058
7.4253	-1.7155
7.4337	-1.7245
7.442	-1.7316
7.4503	-1.7384
7.4587	-1.7433
7.467	-1.749
7.4753	-1.755
7.4837	-1.7603
7.492	-1.7648
7.5003	-1.7695
7.5087	-1.7739
7.517	-1.7798
7.5253	-1.7843
7.5337	-1.7888
7.542	-1.794
7.5503	-1.7998
7.5587	-1.8074
7.567	-1.8109
7.5753	-1.8146
7.5837	-1.8184
7.592	-1.8235
7.6003	-1.8292
7.6087	-1.837
7.617	-1.8422
7.6253	-1.847
7.6337	-1.8508
7.642	-1.8534
7.6503	-1.8554
7.6587	-1.8589
7.667	-1.8609
7.6753	-1.863
7.6837	-1.8644
7.692	-1.8682
7.7003	-1.8703
7.7087	-1.8718
7.717	-1.8751
7.7253	-1.8769
7.7337	-1.8775
7.742	-1.882
7.7503	-1.8841
7.7587	-1.8848
7.767	-1.8851
7.7753	-1.8875
7.7837	-1.8893
7.792	-1.8946
7.8003	-1.8994
7.8087	-1.9021
7.817	-1.9045
7.8253	-1.9067
7.8337	-1.9081
7.842	-1.9095
7.8503	-1.9107
7.8587	-1.9116
7.867	-1.9127
7.8753	-1.9133
7.8837	-1.9147
7.892	-1.9173
7.9003	-1.9193
7.9087	-1.9217
7.917	-1.925
7.9253	-1.9294
7.9337	-1.935
7.942	-1.9371
7.9503	-1.9391
7.9587	-1.9412
7.967	-1.9447
7.9753	-1.9492
7.9837	-1.9563
7.992	-1.9607
8.0003	-1.9643
8.0087	-1.9658
8.017	-1.9682
8.0253	-1.9697
8.0337	-1.9716
8.042	-1.9733
8.0503	-1.974
8.0587	-1.9768
8.067	-1.9784
8.0753	-1.9789
8.0837	-1.9808
8.092	-1.9826
8.1003	-1.9824
8.1087	-1.9839
8.117	-1.9881
8.1253	-1.9878
8.1337	-1.9865
8.142	-1.9847
8.1503	-1.9842
8.1587	-1.9841
8.167	-1.9845
8.1753	-1.984
8.1837	-1.9806
8.192	-1.9761
8.2003	-1.9688
8.2087	-1.9629
8.217	-1.9549
8.2253	-1.9476
8.2337	-1.937
8.242	-1.9277
8.2503	-1.9172
8.2587	-1.9086
8.267	-1.8992
8.2753	-1.89
8.2837	-1.8828
8.292	-1.8754
8.3003	-1.8714
8.3087	-1.8677
8.317	-1.8625
8.3253	-1.8582
8.3337	-1.8574
8.342	-1.8583
8.3503	-1.863
8.3587	-1.8684
8.367	-1.8751
8.3753	-1.8814
8.3837	-1.8887
8.392	-1.8953
8.4003	-1.9049
8.4087	-1.9138
8.417	-1.9237
8.4253	-1.9336
8.4337	-1.9447
8.442	-1.9562
8.4503	-1.9691
8.4587	-1.9813
8.467	-1.9932
8.4753	-2.0054
8.4837	-2.0192
8.492	-2.0321
8.5003	-2.0417
8.5087	-2.0499
8.517	-2.0602
8.5253	-2.0711
8.5337	-2.0824
8.542	-2.0947
8.5503	-2.1047
8.5587	-2.1134
8.567	-2.12
8.5753	-2.1263
8.5837	-2.1317
8.592	-2.1372
8.6003	-2.1422
8.6087	-2.1469
8.617	-2.1499
8.6253	-2.1536
8.6337	-2.1569
8.642	-2.1609
8.6503	-2.1649
8.6587	-2.1681
8.667	-2.1713
8.6753	-2.1776
8.6837	-2.1803
8.692	-2.1817
8.7003	-2.1847
8.7087	-2.1877
8.717	-2.1917
8.7253	-2.1982
8.7337	-2.2036
8.742	-2.2073
8.7503	-2.2097
8.7587	-2.2117
8.767	-2.2134
8.7753	-2.2158
8.7837	-2.2167
8.792	-2.2183
8.8003	-2.2186
8.8087	-2.2185
8.817	-2.2191
8.8253	-2.2218
8.8337	-2.2237
8.842	-2.2247
8.8503	-2.2268
8.8587	-2.2318
8.867	-2.2347
8.8753	-2.2358
8.8837	-2.2366
8.892	-2.2376
8.9003	-2.2407
8.9087	-2.2452
8.917	-2.2507
8.9253	-2.2543
8.9337	-2.2566
8.942	-2.2571
8.9503	-2.2585
8.9587	-2.2594
8.967	-2.26
8.9753	-2.2607
8.9837	-2.2615
8.992	-2.262
9.0003	-2.2615
9.0087	-2.261
9.017	-2.2617
9.0253	-2.2636
9.0337	-2.2649
9.042	-2.2657
9.0503	-2.2697
9.0587	-2.2687
9.067	-2.2689
9.0753	-2.269
9.0837	-2.2711
9.092	-2.2736
9.1003	-2.2778
9.1087	-2.281
9.117	-2.2826
9.1253	-2.2835
9.1337	-2.2828
9.142	-2.2835
9.1503	-2.2839
9.1587	-2.2846
9.167	-2.2841
9.1753	-2.2845
9.1837	-2.2854
9.192	-2.2872
9.2003	-2.2881
9.2087	-2.288
9.217	-2.2886
9.2253	-2.2913
9.2337	-2.2959
9.242	-2.2971
9.2503	-2.2983
9.2587	-2.2992
9.267	-2.3014
9.2753	-2.3043
9.2837	-2.3096
9.292	-2.3153
9.3003	-2.3175
9.3087	-2.3193
9.317	-2.3215
9.3253	-2.3226
9.3337	-2.3242
9.342	-2.3245
9.3503	-2.3243
9.3587	-2.3239
9.367	-2.3265
9.3753	-2.3278
9.3837	-2.3274
9.392	-2.3274
9.4003	-2.3274
9.4087	-2.3261
9.417	-2.3269
9.4253	-2.3268
9.4337	-2.3225
9.442	-2.3191
9.4503	-2.3166
9.4587	-2.3136
9.467	-2.3127
9.4753	-2.3113
9.4837	-2.309
9.492	-2.3043
9.5003	-2.2984
9.5087	-2.2909
9.517	-2.2838
9.5253	-2.2772
9.5337	-2.2697
9.542	-2.2622
9.5503	-2.2548
9.5587	-2.2476
9.567	-2.2421
9.5753	-2.237
9.5837	-2.2316
9.592	-2.2279
9.6003	-2.225
9.6087	-2.2253
9.617	-2.2233
9.6253	-2.2211
9.6337	-2.2217
9.642	-2.2233
9.6503	-2.2282
9.6587	-2.2357
9.667	-2.2428
9.6753	-2.2482
9.6837	-2.2533
9.692	-2.2595
9.7003	-2.2658
9.7087	-2.273
9.717	-2.2793
9.7253	-2.2857
9.7337	-2.2931
9.742	-2.303
9.7503	-2.3098
9.7587	-2.3165
9.767	-2.3242
9.7753	-2.3311
9.7837	-2.3385
9.792	-2.3477
9.8003	-2.3534
9.8087	-2.3571
9.817	-2.3608
9.8253	-2.3656
9.8337	-2.3709
9.842	-2.3793
9.8503	-2.3849
9.8587	-2.3902
9.867	-2.3933
9.8753	-2.3933
9.8837	-2.3977
9.892	-2.3994
9.9003	-2.4011
9.9087	-2.4023
9.917	-2.4035
9.9253	-2.4049
9.9337	-2.406
9.942	-2.4077
9.9503	-2.4084
9.9587	-2.4107
9.967	-2.4129
9.9753	-2.4158
9.9837	-2.4193
9.992	-2.4191
10.0003	-2.4186
10.0087	-2.4205
10.017	-2.4239
10.0253	-2.4292
10.0337	-2.4351
10.042	-2.4389
10.0503	-2.4413
10.0587	-2.4431
10.067	-2.4441
10.0753	-2.4461
10.0837	-2.4482
10.092	-2.4497
10.1003	-2.4505
10.1087	-2.451
10.117	-2.4511
10.1253	-2.4525
10.1337	-2.4548
10.142	-2.4554
10.1503	-2.4563
10.1587	-2.4588
10.167	-2.4627
10.1753	-2.4639
10.1837	-2.464
10.192	-2.4644
10.2003	-2.466
10.2087	-2.4696
10.217	-2.4756
10.2253	-2.4798
10.2337	-2.4812
10.242	-2.4825
10.2503	-2.4831
10.2587	-2.4835
10.267	-2.4846
10.2753	-2.4849
10.2837	-2.4843
10.292	-2.4832
10.3003	-2.4824
10.3087	-2.4819
10.317	-2.4828
10.3253	-2.4834
10.3337	-2.4859
10.342	-2.4875
10.3503	-2.4908
10.3587	-2.4917
10.367	-2.4918
10.3753	-2.4908
10.3837	-2.4915
10.392	-2.4936
10.4003	-2.4983
10.4087	-2.5021
10.417	-2.5045
10.4253	-2.5054
10.4337	-2.5057
10.442	-2.5062
10.4503	-2.5075
10.4587	-2.5077
10.467	-2.5088
10.4753	-2.5089
10.4837	-2.5088
10.492	-2.5082
10.5003	-2.5099
10.5087	-2.5114
10.517	-2.5115
10.5253	-2.5125
10.5337	-2.517
10.542	-2.5198
10.5503	-2.5202
10.5587	-2.5199
10.567	-2.5214
10.5753	-2.5236
10.5837	-2.5274
10.592	-2.5327
10.6003	-2.5363
10.6087	-2.538
10.617	-2.5384
10.6253	-2.5391
10.6337	-2.54
10.642	-2.5411
10.6503	-2.5409
10.6587	-2.5415
10.667	-2.5417
10.6753	-2.5427
10.6837	-2.5435
10.692	-2.5435
10.7003	-2.5446
10.7087	-2.5463
10.717	-2.5483
10.7253	-2.5521
10.7337	-2.553
10.742	-2.5527
10.7503	-2.5525
10.7587	-2.5544
10.767	-2.5568
10.7753	-2.5628
10.7837	-2.5656
10.792	-2.5684
10.8003	-2.5691
10.8087	-2.5702
10.817	-2.5709
10.8253	-2.5711
10.8337	-2.5714
10.842	-2.5707
10.8503	-2.5708
10.8587	-2.5703
10.867	-2.5706
10.8753	-2.5726
10.8837	-2.5736
10.892	-2.5734
10.9003	-2.5748
10.9087	-2.579
10.917	-2.5805
10.9253	-2.5802
10.9337	-2.5801
10.942	-2.5812
10.9503	-2.5839
10.9587	-2.5878
10.967	-2.5932
10.9753	-2.5957
10.9837	-2.5976
10.992	-2.5975
11.0003	-2.5975
11.0087	-2.5973
11.017	-2.598
11.0253	-2.5973
11.0337	-2.5965
11.042	-2.5973
11.0503	-2.599
11.0587	-2.5988
11.067	-2.5979
11.0753	-2.5981
11.0837	-2.5993
11.092	-2.6016
11.1003	-2.6046
11.1087	-2.6035
11.117	-2.6027
11.1253	-2.6023
11.1337	-2.6034
11.142	-2.6068
11.1503	-2.6099
11.1587	-2.6119
11.167	-2.6124
11.1753	-2.6133
11.1837	-2.6126
11.192	-2.6127
11.2003	-2.6117
11.2087	-2.6111
11.217	-2.6103
11.2253	-2.6087
11.2337	-2.6077
11.242	-2.6068
11.2503	-2.6075
11.2587	-2.6069
11.267	-2.6082
11.2753	-2.609
11.2837	-2.6125
11.292	-2.6118
11.3003	-2.6108
11.3087	-2.61
11.317	-2.6101
11.3253	-2.6135
11.3337	-2.6175
11.342	-2.621
11.3503	-2.6223
11.3587	-2.6237
11.367	-2.6222
11.3753	-2.6216
11.3837	-2.6212
11.392	-2.62
11.4003	-2.6194
11.4087	-2.6183
11.417	-2.6196
11.4253	-2.6186
11.4337	-2.617
11.442	-2.6156
11.4503	-2.6138
11.4587	-2.6101
11.467	-2.6109
11.4753	-2.6087
11.4837	-2.6028
11.492	-2.5975
11.5003	-2.5918
11.5087	-2.5855
11.517	-2.5805
11.5253	-2.5748
11.5337	-2.5637
11.542	-2.5488
11.5503	-2.5313
11.5587	-2.5096
11.567	-2.4855
11.5753	-2.4573
11.5837	-2.4239
11.592	-2.3847
11.6003	-2.339
11.6087	-2.2868
11.617	-2.2283
11.6253	-2.1593
11.6337	-2.0835
11.642	-1.9973
11.6503	-1.8999
11.6587	-1.7905
11.667	-1.664
11.6753	-1.5231
11.6837	-1.3669
11.692	-1.1957
11.7003	-1.0087
11.7087	-0.8047
11.717	-0.5801
11.7253	-0.3362
11.7337	-0.0725
11.742	0.2092
11.7503	0.508
11.7587	0.8232
11.767	1.1515
11.7753	1.4934
11.7837	1.8453
11.792	2.2059
11.8003	2.5719
11.8087	2.9413
11.817	3.3092
11.8253	3.6744
11.8337	4.0334
11.842	4.3819
11.8503	4.7162
11.8587	5.033
11.867	5.3311
11.8753	5.6059
11.8837	5.8551
11.892	6.0758
11.9003	6.2654
11.9087	6.422
11.917	6.545
11.9253	6.6322
11.9337	6.6846
11.942	6.6991
11.9503	6.6782
11.9587	6.6213
11.967	6.531
11.9753	6.408
11.9837	6.2547
11.992	6.0703
12.0003	5.8616
12.0087	5.628
12.017	5.3731
12.0253	5.0999
12.0337	4.8074
12.042	4.5042
12.0503	4.1909
12.0587	3.8707
12.067	3.5448
12.0753	3.2172
12.0837	2.8869
12.092	2.5603
12.1003	2.2382
12.1087	1.9228
12.117	1.6161
12.1253	1.3208
12.1337	1.035
12.142	0.7629
12.1503	0.5041
12.1587	0.2584
12.167	0.0262
12.1753	-0.191
12.1837	-0.3948
12.192	-0.5853
12.2003	-0.7612
12.2087	-0.9247
12.217	-1.079
12.2253	-1.2169
12.2337	-1.3423
12.242	-1.4581
12.2503	-1.564
12.2587	-1.663
12.267	-1.7541
12.2753	-1.8365
12.2837	-1.9086
12.292	-1.9732
12.3003	-2.0303
12.3087	-2.0828
12.317	-2.1292
12.3253	-2.1709
12.3337	-2.2082
12.342	-2.2404
12.3503	-2.2704
12.3587	-2.2995
12.367	-2.3238
12.3753	-2.3456
12.3837	-2.3658
12.392	-2.3863
12.4003	-2.4057
12.4087	-2.4209
12.417	-2.4333
12.4253	-2.4461
12.4337	-2.458
12.442	-2.4708
12.4503	-2.4844
12.4587	-2.4969
12.467	-2.5075
12.4753	-2.5151
12.4837	-2.5217
12.492	-2.5286
12.5003	-2.535
12.5087	-2.54
12.517	-2.5451
12.5253	-2.549
12.5337	-2.5553
12.542	-2.5582
12.5503	-2.5621
12.5587	-2.5671
12.567	-2.5704
12.5753	-2.5745
12.5837	-2.581
12.592	-2.5863
12.6003	-2.5876
12.6087	-2.5893
12.617	-2.5907
12.6253	-2.5943
12.6337	-2.6008
12.642	-2.6073
12.6503	-2.6116
12.6587	-2.6147
12.667	-2.6167
12.6753	-2.6174
12.6837	-2.6192
12.692	-2.6208
12.7003	-2.6216
12.7087	-2.6217
12.717	-2.6222
12.7253	-2.6239
12.7337	-2.6252
12.742	-2.6266
12.7503	-2.6276
12.7587	-2.6282
12.767	-2.6299
12.7753	-2.6335
12.7837	-2.6338
12.792	-2.6324
12.8003	-2.6321
12.8087	-2.634
12.817	-2.6372
12.8253	-2.6426
12.8337	-2.6449
12.842	-2.6456
12.8503	-2.6445
12.8587	-2.6427
12.867	-2.6416
12.8753	-2.6401
12.8837	-2.6384
12.892	-2.6344
12.9003	-2.6314
12.9087	-2.6258
12.917	-2.6218
12.9253	-2.619
12.9337	-2.6145
12.942	-2.6097
12.9503	-2.6059
12.9587	-2.6034
12.967	-2.5968
12.9753	-2.588
12.9837	-2.5798
12.992	-2.5727
13.0003	-2.5656
13.0087	-2.5609
13.017	-2.5539
13.0253	-2.5449
13.0337	-2.5348
13.042	-2.5243
13.0503	-2.5124
13.0587	-2.5001
13.067	-2.4894
13.0753	-2.4768
13.0837	-2.4636
13.092	-2.451
13.1003	-2.439
13.1087	-2.4263
13.117	-2.4163
13.1253	-2.4072
13.1337	-2.3968
13.142	-2.3888
13.1503	-2.3837
13.1587	-2.3744
13.167	-2.366
13.1753	-2.3606
13.1837	-2.3563
13.192	-2.3553
13.2003	-2.3572
13.2087	-2.3578
13.217	-2.3566
13.2253	-2.3566
13.2337	-2.3563
13.242	-2.3582
13.2503	-2.3605
13.2587	-2.3634
13.267	-2.3673
13.2753	-2.3715
13.2837	-2.3749
13.292	-2.3834
13.3003	-2.3918
13.3087	-2.3992
13.317	-2.408
13.3253	-2.4188
13.3337	-2.4318
13.342	-2.4399
13.3503	-2.4476
13.3587	-2.4575
13.367	-2.4674
13.3753	-2.4785
13.3837	-2.4905
13.392	-2.5008
13.4003	-2.5077
13.4087	-2.5129
13.417	-2.5157
13.4253	-2.5169
13.4337	-2.5161
13.442	-2.512
13.4503	-2.5039
13.4587	-2.4924
13.467	-2.4764
13.4753	-2.4531
13.4837	-2.4227
13.492	-2.3865
13.5003	-2.3391
13.5087	-2.278
13.517	-2.2034
13.5253	-2.1113
13.5337	-1.9934
13.542	-1.85
13.5503	-1.6776
13.5587	-1.4699
13.567	-1.2212
13.5753	-0.922
13.5837	-0.564
13.592	-0.1371
13.6003	0.3666
13.6087	0.9563
13.617	1.644
13.6253	2.4405
13.6337	3.3577
13.642	4.4065
13.6503	5.5958
13.6587	6.9384
13.667	8.4465
13.6753	10.1225
13.6837	11.9709
13.692	14.0003
13.7003	16.2122
13.7087	18.5826
13.717	21.0953
13.7253	23.7385
13.7337	26.4842
13.742	29.3046
13.7503	32.1761
13.7587	35.0592
13.767	37.8977
13.7753	40.6761
13.7837	43.3514
13.792	45.9116
13.8003	48.3278
13.8087	50.6022
13.817	52.7178
13.8253	54.6707
13.8337	56.469
13.842	58.1145
13.8503	59.6002
13.8587	60.9423
13.867	62.1445
13.8753	63.2055
13.8837	64.1372
13.892	64.9513
13.9003	65.6168
13.9087	66.1805
13.917	66.6403
13.9253	67.0064
13.9337	67.2945
13.942	67.4894
13.9503	67.5998
13.9587	67.6301
13.967	67.6002
13.9753	67.5039
13.9837	67.3563
13.992	67.148
14.0003	66.8911
14.0087	66.58
14.017	66.2217
14.0253	65.8133
14.0337	65.3707
14.042	64.8809
14.0503	64.343
14.0587	63.7573
14.067	63.1304
14.0753	62.4691
14.0837	61.7319
14.092	60.9507
14.1003	60.1273
14.1087	59.2555
14.117	58.3408
14.1253	57.3792
14.1337	56.3502
14.142	55.2584
14.1503	54.1059
14.1587	52.9069
14.167	51.6524
14.1753	50.3564
14.1837	49.0055
14.192	47.6132
14.2003	46.1714
14.2087	44.6951
14.217	43.1791
14.2253	41.6323
14.2337	40.0584
14.242	38.4607
14.2503	36.8477
14.2587	35.2309
14.267	33.5937
14.2753	31.9531
14.2837	30.3269
14.292	28.7225
14.3003	27.1362
14.3087	25.5921
14.317	24.073
14.3253	22.588
14.3337	21.1471
14.342	19.7561
14.3503	18.4183
14.3587	17.1419
14.367	15.9296
14.3753	14.7791
14.3837	13.6962
14.392	12.6762
14.4003	11.7244
14.4087	10.837
14.417	10.012
14.4253	9.2487
14.4337	8.5415
14.442	7.8879
14.4503	7.2889
14.4587	6.7311
14.467	6.221
14.4753	5.7552
14.4837	5.3256
14.492	4.9318
14.5003	4.5711
14.5087	4.2396
14.517	3.937
14.5253	3.6592
14.5337	3.4043
14.542	3.1706
14.5503	2.9548
14.5587	2.7566
14.567	2.5742
14.5753	2.4079
14.5837	2.2529
14.592	2.1101
14.6003	1.9758
14.6087	1.8512
14.617	1.7355
14.6253	1.6274
14.6337	1.5244
14.642	1.427
14.6503	1.3387
14.6587	1.2553
14.667	1.1758
14.6753	1.0994
14.6837	1.026
14.692	0.954
14.7003	0.8881
14.7087	0.8266
14.717	0.7679
14.7253	0.7123
14.7337	0.6594
14.742	0.6078
14.7503	0.56
14.7587	0.5129
14.767	0.4683
14.7753	0.4242
14.7837	0.3832
14.792	0.3443
14.8003	0.3059
14.8087	0.2684
14.817	0.2328
14.8253	0.1962
14.8337	0.1629
14.842	0.1323
14.8503	0.1022
14.8587	0.0715
14.867	0.0408
14.8753	0.0095
14.8837	-0.0197
14.892	-0.0466
14.9003	-0.072
14.9087	-0.0969
14.917	-0.1203
14.9253	-0.1434
14.9337	-0.1652
14.942	-0.186
14.9503	-0.2062
14.9587	-0.2252
14.967	-0.2449
14.9753	-0.2651
14.9837	-0.2842
14.992	-0.3016
15.0003	-0.319
15.0087	-0.3388
15.017	-0.3566
15.0253	-0.3721
15.0337	-0.3877
15.042	-0.4032
15.0503	-0.4196
15.0587	-0.4387
15.067	-0.4565
15.0753	-0.4719
15.0837	-0.4862
15.092	-0.4981
15.1003	-0.5109
15.1087	-0.5233
15.117	-0.5352
15.1253	-0.5466
15.1337	-0.5572
15.142	-0.5697
15.1503	-0.5826
15.1587	-0.5917
15.167	-0.6023
15.1753	-0.6137
15.1837	-0.6247
15.192	-0.636
15.2003	-0.6475
15.2087	-0.6558
15.217	-0.664
15.2253	-0.6727
15.2337	-0.6833
15.242	-0.6957
15.2503	-0.7078
15.2587	-0.7178
15.267	-0.7268
15.2753	-0.7343
15.2837	-0.7414
15.292	-0.7496
15.3003	-0.7563
15.3087	-0.7637
15.317	-0.7692
15.3253	-0.7752
15.3337	-0.7811
15.342	-0.7883
15.3503	-0.7954
15.3587	-0.8031
15.367	-0.8086
15.3753	-0.8152
15.3837	-0.8257
15.392	-0.8318
15.4003	-0.8364
15.4087	-0.841
15.417	-0.8478
15.4253	-0.8553
15.4337	-0.8647
15.442	-0.8735
15.4503	-0.8789
15.4587	-0.8838
15.467	-0.8872
15.4753	-0.8917
15.4837	-0.8954
15.492	-0.9001
15.5003	-0.9034
15.5087	-0.9053
15.517	-0.9107
15.5253	-0.9151
15.5337	-0.919
15.542	-0.9214
15.5503	-0.9258
15.5587	-0.9298
15.567	-0.9358
15.5753	-0.9395
15.5837	-0.941
15.592	-0.9436
15.6003	-0.9469
15.6087	-0.9513
15.617	-0.9586
15.6253	-0.9651
15.6337	-0.9694
15.642	-0.9725
15.6503	-0.9758
15.6587	-0.9767
15.667	-0.9787
15.6753	-0.9813
15.6837	-0.983
15.692	-0.9862
15.7003	-0.9877
15.7087	-0.9891
15.717	-0.9908
15.7253	-0.9928
15.7337	-0.9955
15.742	-0.9973
15.7503	-1.001
15.7587	-1.0072
15.767	-1.0077
15.7753	-1.0094
15.7837	-1.0114
15.792	-1.014
15.8003	-1.0191
15.8087	-1.025
15.817	-1.0285
15.8253	-1.031
15.8337	-1.0325
15.842	-1.0337
15.8503	-1.0345
15.8587	-1.036
15.867	-1.0365
15.8753	-1.0377
15.8837	-1.0374
15.892	-1.0385
15.9003	-1.0392
15.9087	-1.0408
15.917	-1.0427
15.9253	-1.0434
15.9337	-1.045
15.942	-1.0503
15.9503	-1.0513
15.9587	-1.0502
15.967	-1.05
15.9753	-1.052
15.9837	-1.0551
15.992	-1.0598
16.0003	-1.0643
16.0087	-1.0647
16.017	-1.0659
16.0253	-1.0656
16.0337	-1.0664
16.042	-1.0666
16.0503	-1.0678
16.0587	-1.0663
16.067	-1.0681
16.0753	-1.0675
16.0837	-1.0681
16.092	-1.0689
16.1003	-1.0684
16.1087	-1.071
16.117	-1.073
16.1253	-1.0765
16.1337	-1.0783
16.142	-1.078
16.1503	-1.0771
16.1587	-1.0782
16.167	-1.0808
16.1753	-1.0861
16.1837	-1.0906
16.192	-1.0922
16.2003	-1.093
16.2087	-1.0933
16.217	-1.0924
16.2253	-1.0925
16.2337	-1.0922
16.242	-1.0924
16.2503	-1.0903
16.2587	-1.0915
16.267	-1.0907
16.2753	-1.0895
16.2837	-1.0887
16.292	-1.0868
16.3003	-1.0848
16.3087	-1.0844
16.317	-1.0864
16.3253	-1.0831
16.3337	-1.0798
16.342	-1.0779
16.3503	-1.0754
16.3587	-1.0751
16.367	-1.0757
16.3753	-1.0753
16.3837	-1.0719
16.392	-1.0683
16.4003	-1.0628
16.4087	-1.0586
16.417	-1.0539
16.4253	-1.0493
16.4337	-1.0439
16.442	-1.0378
16.4503	-1.0335
16.4587	-1.0304
16.467	-1.0263
16.4753	-1.0213
16.4837	-1.0186
16.492	-1.0157
16.5003	-1.0148
16.5087	-1.011
16.517	-1.0063
16.5253	-1.0033
16.5337	-1.002
16.542	-1.0018
16.5503	-1.0048
16.5587	-1.006
16.567	-1.0073
16.5753	-1.007
16.5837	-1.0068
16.592	-1.0064
16.6003	-1.0077
16.6087	-1.0092
16.617	-1.0106
16.6253	-1.0128
16.6337	-1.0176
16.642	-1.02
16.6503	-1.0229
[truncated: 2,802 more rows]
