# Supplementary material for: Polysaccharide fromPleurotus tuber-regiummycelium improves DSS-induced colitis in mice by regulating inflammatory cytokines, oxidative stress and gut microbiota
Source: Royal Society of Chemistry journal article supplement (doi:10.1039/d3fo05583c), 2024-01-01
Supplement: d3fo05583c2.xlsx [file d3fo05583c2.xlsx]

## Sheet: Body Weight change
Day	Body Weight change (%)
	Control										DSS										PTRPL										PTRPH
1	0	0	0	0	0	0	0	0	0	0	0	0	0	0	0	0	0	0	0	0	0	0	0	0	0	0	0	0	0	0	0	0	0	0	0	0	0	0	0	0
2	1.06	1.23	0.05	0.98	2.26	0.42	3.25	0.95	0.02	0.74	2.02	-0.68	0.86	2.06	2.05	0.75	0.77	2.28	1.13	0.83	1.07	1.37	0.7	3.03	-1.66	0.54	0.84	2.1	1.86	1.11	0.07	1.33	0.43	0.56	3.34	-0.62	-0.68	-0.2	1.54	1.41
3	3.21	2.83	1.25	1.56	3.5	1.87	3.45	0.48	2.11	0.41	1.11	1.08	0.63	1.12	0.5	1.33	1.21	0.47	0.54	0.44	1.6	1.01	0.15	1.8	0.05	0.69	1.82	3.78	0.76	1.26	0.29	2.52	0.45	0.56	2.37	0.62	0.1	1.48	1.67	0.3
4	3.13	3.44	3.12	2.86	4.26	3.41	2.55	1.47	4.02	1.67	0.56	2.72	1.86	2.62	0.55	3.36	2.98	3.06	1.76	1.52	3.84	4.4	3.25	4.52	3.7	1.78	2.76	4.48	2.72	1.61	1.64	3.66	1.52	1.82	4.32	1.47	1.94	3.21	2.17	1.8
5	6.22	3.79	4.2	5.77	3.71	2.94	5.25	4.24	4.16	0.51	4.65	3.74	2.67	4.71	1.85	5.39	3.8	5.91	3.87	3.52	5.68	4.62	2.4	4.72	3.33	2.03	7.79	5.41	3.96	5.18	2.31	1.9	2.52	5.17	6.22	2.9	2.23	6.43	1.65	6.48
6	5.4	5.64	5.84	6.22	4.91	4.73	4.44	5.1	5.77	3.02	6.01	3.53	4.8	4.66	3.54	6.38	5.82	4.04	3.08	3.93	6.17	3.85	4.09	5.89	4.08	3	7.1	5.6	3.57	6.98	2.23	1.95	5.9	2.79	6.59	5.86	1.99	4.35	4.34	4.58
7	8.19	3.69	5.12	6.58	4.21	6.82	8.78	6.15	7.38	2.39	3.84	6.79	4.71	6.75	3.69	6.72	6.03	5.03	5.92	5.47	8.35	6.36	4.49	4.88	5.64	1.53	10.31	6.81	4.82	6.69	3.9	4.19	4.14	5.12	5.85	5.69	3.7	4.75	5.62	6.78
8	9.06	4.31	5.97	7.97	6.92	6.68	7.8	7.43	8.99	3.08	6.42	7.88	7.61	8.55	4.24	8.55	4.45	5.03	4.8	4.26	10.49	7.97	5.24	7.7	7.3	1.93	11.34	7.7	5.96	7.34	5.9	4.52	5.79	5.93	7.01	7.46	5.28	5.29	7.6	7.75
9	11.28	5.23	4.34	6.94	5.17	8.36	10.56	7	10.36	4.23	5.66	7.72	7.61	6.56	3.19	10.75	2.7	3.28	2.92	3.7	10.39	9.16	5.24	6.52	7.12	3.66	12.38	8.96	3.67	8.2	7.29	6.66	7.34	8.26	8.73	9.43	7.89	9.05	9.36	8.73
10	10.8	7.38	5.12	7.88	7.17	8.92	10.29	8.72	8.33	4.32	7.22	6.97	8.78	6.95	3.04	10.6	1.18	6.74	1.47	1.84	8.84	9.25	4.44	7.55	8.83	2.13	11.64	6.63	4.39	6.89	7.03	5.76	7.71	7.14	6.87	8.92	5.1	9.74	9.89	9.07
11	12.34	6.26	6.54	7.97	7.22	9.85	10.24	9.96	10.36	6.3	6.22	1.31	8.74	9.28	3.19	10.23	5.08	6.06	6.66	4.24	11.8	11.03	4.99	7.08	11.23	3.71	14.6	8.07	6.2	9.21	5.15	4.82	8.57	6.59	5.29	9.82	6.3	9.99	10.83	10.97
12	12.58	8.05	7.61	11.82	9.33	10.6	13.92	11.2	12.54	8.73	8.29	0.81	5.22	11.07	3.49	9.74	6.05	9.43	9.3	5.72	12.53	10.81	6.54	9.09	12.29	5.34	17.65	9.24	8.97	12.58	10.63	6.43	10.96	13.07	9.61	12.9	10.05	11.72	9.06	13.36
13	13.69	8.1	9.51	12.58	8.98	10.46	12.24	12.34	14.58	8.41	5.28	-0.45	3.6	9.78	1.55	5.73	5.8	6.41	9.06	2.31	13.7	8.52	6.34	9.03	8.83	5.04	12.87	6.81	9.16	10.16	10.36	4.98	9.52	10.03	7.24	10.52	10.15	8.36	7.66	12.29
14	14.89	10.41	8.54	12.26	11.03	13.21	15.82	12.77	16.9	10.02	2.52	-0.86	1.3	8.74	0.85	4.12	4.26	3.07	5.63	0.36	12.92	8.65	5.29	7.44	5.18	3.46	4.09	6.44	3.77	7.29	5.43	0.63	5	10.69	5.2	6.1	8.27	3.17	7.61	7.07
15	14.41	10.36	10.63	13.95	12.98	13.17	14.46	13.39	15.43	11.11	-1.05	-5.12	-3.04	3.07	-3.59	0.38	-0.92	-1.83	1.36	-3.85	9.52	3.53	2.45	4.31	5.22	-2.08	0.74	0.98	-2.24	3.57	3.5	-2.26	3.23	7.47	-1.02	2.64	3.96	-1.24	4.75	3.66

## Sheet: DAI
Day	DAI score
	Control										DSS										PTRPL										PTRPH
8	0	0	0	0	0	0	0	0	0	0	0	0	0	0	0	0	0	0	0	0	0	0	0	0	0	0	0	0	0	0	0	0	0	0	0	0	0	0	0	0
9	0	0.17	0.17	0.33	0.5	0	0.17	0.17	0.17	0.33	0.5	0.17	0.33	0.33	0.67	0.33	0.17	0.33	0.33	0.33	0	0.33	0.33	0.67	0.17	0.17	0.33	0.17	0.5	0.33	0.17	0.17	0	0.33	0.33	0.33	0.17	0.33	0	0.17
10	0.17	0	0.5	0.5	0.17	0.17	0.33	0.5	0.33	0.17	0.5	0.67	0.33	0.67	0.67	0.17	0.33	0.67	0.17	0.67	0.5	0.5	0	0	0	0.67	0.17	0.67	0.67	0.5	0.33	0.5	0.17	0.5	0.5	0.33	0.33	0	0.5	0.67
11	0	0.33	0	0.17	0	0	0	0.17	0	0.17	0.33	0.33	0.33	0.33	0.83	0.33	0.33	0.5	0.83	0.33	0.5	0.17	0.33	0.17	0.17	0.33	0.83	0.67	0.67	0.33	0.5	0.33	0.5	0.17	1	0.67	0.17	0.17	0.17	0.17
12	0.33	0.5	0.33	0.33	0.33	0.17	0.17	0.67	0	0.33	1.67	0.67	0.67	0.67	0.33	0.5	0.67	0.5	0.33	0.67	0.67	1	0.67	0.67	0.67	0.67	0.5	0.33	0.5	0.67	1	0.5	0.67	0.17	0.33	0.33	0.33	0.5	0.5	0.33
13	0	0.17	0.67	0.67	0.33	0	0.67	0.17	0.67	0.17	2	1.67	2	1.33	1.33	1	1.33	1.33	1.67	0.67	0.67	0.67	0.33	0.33	2.67	0.33	2	1.17	2.33	1.5	1.33	0.67	1.17	1.33	1.17	0.33	1	0.67	0.83	1.33
14	0	0.17	0.17	0.17	0	0.17	0	0.67	0	0.17	1.67	1.67	2.33	2.33	1.67	2	2.33	2.33	2.33	2	1.33	1.67	2	1.33	2	1.33	2	1.67	2.33	1	1.67	2	1.33	1.33	2.33	1	1.67	1.67	1.33	1.33
15	0	0	0.17	0.33	0.5	0	0.33	0.67	0.17	0.17	3.33	3	3	3	3	2.67	2.67	2	2.67	2.33	2.33	2	2	2.67	1.67	3	2.67	2	2.67	2.33	2.33	2.33	2	3	2.67	2.33	2.33	2.33	2	2

## Sheet: Spleen index
number	Spleen index(%)
	Control	DSS	PTRPL	PTRPH
1	0.27	0.51	0.32	0.33
2	0.24	0.33	0.32	0.4
3	0.24	0.56	0.33	0.29
4	0.28	0.4	0.31	0.29
5	0.29	0.49	0.47	0.29

## Sheet: Colon length
number	Colon length(cm)
	Control	DSS	PTRPL	PTRPH
1	8.5	4.5	5.1	6
2	8.3	4.9	5.2	5.5
3	8.2	4	5.2	5.5
4	7.6	5	5.6	5.7
5	8.4	4.9	5.8	6
