# Supplementary material for: Polysaccharide fromPleurotus tuber-regiummycelium improves DSS-induced colitis in mice by regulating inflammatory cytokines, oxidative stress and gut microbiota
Source: Royal Society of Chemistry journal article supplement (doi:10.1039/d3fo05583c), 2024-01-01
Supplement: d3fo05583c3.xlsx [file d3fo05583c3.xlsx]

## Sheet: TNF-α
number	TNF-α (ng/L)
	Control	DSS	PTRPL	PTRPH
1	650	1153.85	972.53	732.31
2	557.69	1275.64	842.31	823.08
3	673.08	1134.62	950.55	759.62
4	803.85	1134.62	951.92	734.62
5	496.15	1165.38	962.31	761.92

## Sheet: IL-1β
number	IL-1β (ng/L)
	Control	DSS	PTRPL	PTRPH
1	2.16	4.09	3.04	3.28
2	2.33	3.57	3.53	3.02
3	2.14	4.59	3.49	2.85
4	2.26	3.96	3.61	3.35
5	2.67	4.57	3.51	3.17

## Sheet: IL-6
number	IL-1β (pg/L)
	Control	DSS	PTRPL	PTRPH
1	40.07	88.24	62.96	60.05
2	33.27	99.26	65.44	46.32
3	42.06	92.28	60.29	43.01
4	34.71	94.54	64.71	65.44
5	33.09	97.69	47.79	48.31
