# Supplementary material for: Polysaccharide fromPleurotus tuber-regiummycelium improves DSS-induced colitis in mice by regulating inflammatory cytokines, oxidative stress and gut microbiota
Source: Royal Society of Chemistry journal article supplement (doi:10.1039/d3fo05583c), 2024-01-01
Supplement: d3fo05583c4.xlsx [file d3fo05583c4.xlsx]

## Sheet: MPO
number	MPO (U/g)
	Control	DSS	PTRPL	PTRPH
1	11.11	132.44	100.44	39.78
2	7.11	137.78	87.11	50.44
3	9.78	139.11	90.44	51.11
4	8.44	146.44	94.44	52.44
5	12.44	141.11	97.78	54.44

## Sheet: MDA
number	MDA (nmol/g)
	Control	DSS	PTRPL	PTRPH
1	0.84	1.44	1.08	1.03
2	0.8	1.31	1.07	1.01
3	0.67	1.49	1.19	1.04
4	0.86	1.47	1.09	0.86
5	0.87	1.31	1.09	0.9

## Sheet: GSH
number	GSH (umol/g)
	Control	DSS	PTRPL	PTRPH
1	1.21	0.77	1.06	1.37
2	1.34	0.66	1.1	1.17
3	1.41	0.7	1.19	1.01
4	1.32	0.63	0.86	1.03
5	1.36	0.74	0.77	0.99

## Sheet: SOD
number	SOD (U/g)
	Control	DSS	PTRPL	PTRPH
1	83.18	30.81	41.68	49.46
2	76.66	27.49	40	48.96
3	82.24	27.89	37.04	49.14
4	70.38	23.92	37.43	46.75
5	69.15	29.43	46.67	60.55

## Sheet: CAT
number	CAT (U/g)
	Control	DSS	PTRPL	PTRPH
1	132.4	52.8	85.2	97.2
2	133.6	64.4	80	108.8
3	144	63.6	88	97.6
4	159.6	62.8	82.4	98.4
5	129.6	51.6	81.6	94
