# Supplementary material for: Polysaccharide fromPleurotus tuber-regiummycelium improves DSS-induced colitis in mice by regulating inflammatory cytokines, oxidative stress and gut microbiota
Source: Royal Society of Chemistry journal article supplement (doi:10.1039/d3fo05583c), 2024-01-01
Supplement: d3fo05583c5.xlsx [file d3fo05583c5.xlsx]

## Sheet: Relative abundance of 10 types 
group	Relative abundance (%)
	Bacteroidetes	Firmicutes	Proteobacteria	Verrucomicrobia	Actinobacteria	TM7	Tenericutes	Cyanobacteria	Chlorobi	[Thermi]
Control	43.44	32.91	10	10.46	1.93	0.49	0.31	0.01	0	0
DSS	33.58	27.88	23.47	13.74	0.98	0.08	0	0.03	0	0
PTRPL	41.7	29.41	16.68	8.66	2.71	0.21	0.04	0.04	0	0
PTRPH	42.42	20.61	12.16	13.61	10.48	0.03	0	0.03	0.01	0

## Sheet: Relative abundance of represent
bacteria	Relative abundance (%)
	Control					DSS					PTRPL					PTRPH
Bacteroidetes	38.8	40.76	47.82	49.08	40.73	31.5	30.24	38.72	32.25	35.16	14.03	54.34	48.08	47.23	44.8	37.54	40.21	37.82	53.29	38.64
Firmicutes	42.46	39.09	23.09	26.27	33.64	24.94	29.97	32.51	36.81	15.15	61.22	19.33	19.56	21.4	25.55	19.16	21.07	20.27	21.94	20.26
Proteobacteria	4.71	4.59	17.65	11.48	11.56	32.54	35.17	12.63	15.66	21.36	15.83	5.02	27.72	11.94	22.9	14.85	11.08	7.72	14.99	20.82
Verrucomicrobia	11.27	13.24	8	8.82	10.98	8.95	3.02	14.98	14.13	27.64	4.23	18.73	1.86	16.88	1.57	19.85	15.82	8.11	10.65	9.69
Actinobacteria	1.65	1.69	0.73	3.3	2.27	1.66	1.12	0.85	0.87	0.37	4.03	1.79	2.43	1.2	4.1	7.82	11.17	10.02	12.9	9.28

## Sheet: F-B ratio
number	F/B ratio
	Control	DSS	PTRPL	PTRPH
1	1.09	0.79	4.36	0.51
2	0.96	0.99	0.36	0.52
3	0.48	0.84	0.41	0.38
4	0.54	1.14	0.45	0.57
5	0.83	0.43	0.57	0.54

## Sheet: Alpha diversity
index	Alpha diversity
	Control	DSS	PTRPL	PTRPH
Chao1	2031	1220.36	1974.59	1802.54
	2861.26	1830.31	2247.02	1577.82
	2390.65	760.28	1723.17	1989.05
	2279.66	1009.76	2724.64	1820.82
	2877.58	1497.57	1923.57	2248.74
Simpson	0.9382	0.9125	0.9716	0.965
	0.9614	0.9177	0.9567	0.9487
	0.9533	0.8982	0.9635	0.9631
	0.9654	0.955	0.9675	0.9762
	0.972	0.9402	0.9639	0.979
Shannon	6.53	5.88	7.26	6.7
	7.53	6.19	7.19	6.49
	7.32	5.17	6.76	6.89
	7.03	6.17	7.68	6.88
	7.63	5.95	7.17	7.39
Pielou_e	0.6053	0.577	0.668	0.6285
	0.6665	0.5845	0.6505	0.614
	0.6601	0.5636	0.6405	0.6374
	0.6418	0.6279	0.6793	0.6381
	0.6747	0.5723	0.6609	0.6728
Observed_species	1769.8	1163.1	1878.4	1622.1
	2511.1	1548.1	2129.2	1515.9
	2177.5	578.1	1507.8	1913.4
	1978.4	907.8	2538.6	1624.86
	2534.1	1354.3	1840.7	2016.8
Faith_pd	116.59	79.62	121.75	113.92
	135.38	113.44	129.34	104.52
	121.54	60.03	87.23	126.01
	124.03	95.02	146.18	115.52
	125.2	91.22	114.95	134.9

## Sheet: Beta diversity
Beta diversity with Bray-Curtis distance
	Control1	Control2	Control3	Control4	Control5	DSS1	DSS2	DSS3	DSS4	DSS5	PTRPL1	PTRPL2	PTRPL3	PTRPL4	PTRPL5	PTRPH1	PTRPH2	PTRPH3	PTRPH4	PTRPH5
Control1	0	0.3157	0.4731	0.3982	0.3256	0.8041	0.8811	0.8156	0.7929	0.7889	0.8495	0.6482	0.8529	0.6273	0.8817	0.7739	0.7356	0.8294	0.7674	0.7086
Control2	0.3157	0	0.5019	0.4105	0.3347	0.8086	0.8828	0.798	0.7778	0.7832	0.8487	0.6423	0.8696	0.6347	0.8841	0.7654	0.7302	0.8328	0.7778	0.7151
Control3	0.4731	0.5019	0	0.4135	0.3953	0.8074	0.8615	0.855	0.8388	0.7609	0.8427	0.6635	0.8119	0.6181	0.8669	0.8068	0.7487	0.829	0.7444	0.7311
Control4	0.3982	0.4105	0.4135	0	0.3276	0.7737	0.8553	0.791	0.7831	0.7196	0.842	0.6439	0.7621	0.6139	0.838	0.7554	0.6915	0.8087	0.7134	0.6661
Control5	0.3256	0.3347	0.3953	0.3276	0	0.7942	0.8692	0.8175	0.8003	0.7271	0.8537	0.6442	0.8066	0.6142	0.8685	0.7651	0.7167	0.8152	0.7501	0.6866
DSS1	0.8041	0.8086	0.8074	0.7737	0.7942	0	0.3938	0.5315	0.5207	0.596	0.7594	0.6482	0.4695	0.6897	0.5425	0.5401	0.5655	0.411	0.5702	0.5341
DSS2	0.8811	0.8828	0.8615	0.8553	0.8692	0.3938	0	0.7548	0.6805	0.7652	0.7851	0.7392	0.5913	0.7837	0.4903	0.6569	0.5903	0.419	0.5638	0.5894
DSS3	0.8156	0.798	0.855	0.791	0.8175	0.5315	0.7548	0	0.3852	0.4219	0.8428	0.7133	0.5498	0.728	0.7938	0.5929	0.6769	0.7581	0.75	0.6383
DSS4	0.7929	0.7778	0.8388	0.7831	0.8003	0.5207	0.6805	0.3852	0	0.5572	0.8424	0.724	0.543	0.6961	0.7264	0.642	0.6862	0.6872	0.7282	0.6348
DSS5	0.7889	0.7832	0.7609	0.7196	0.7271	0.596	0.7652	0.4219	0.5572	0	0.8734	0.6651	0.5251	0.6816	0.794	0.5101	0.6689	0.7563	0.7718	0.6898
PTRPL1	0.8495	0.8487	0.8427	0.842	0.8537	0.7594	0.7851	0.8428	0.8424	0.8734	0	0.7919	0.7992	0.7317	0.7911	0.7419	0.7278	0.7541	0.7278	0.6816
PTRPL2	0.6482	0.6423	0.6635	0.6439	0.6442	0.6482	0.7392	0.7133	0.724	0.6651	0.7919	0	0.7734	0.4569	0.6834	0.5545	0.532	0.7302	0.585	0.6035
PTRPL3	0.8529	0.8696	0.8119	0.7621	0.8066	0.4695	0.5913	0.5498	0.543	0.5251	0.7992	0.7734	0	0.7571	0.635	0.5401	0.7112	0.6763	0.7021	0.5922
PTRPL4	0.6273	0.6347	0.6181	0.6139	0.6142	0.6897	0.7837	0.728	0.6961	0.6816	0.7317	0.4569	0.7571	0	0.7479	0.6339	0.5619	0.7334	0.6257	0.6129
PTRPL5	0.8817	0.8841	0.8669	0.838	0.8685	0.5425	0.4903	0.7938	0.7264	0.794	0.7911	0.6834	0.635	0.7479	0	0.6238	0.5427	0.5567	0.4787	0.6209
PTRPH1	0.7739	0.7654	0.8068	0.7554	0.7651	0.5401	0.6569	0.5929	0.642	0.5101	0.7419	0.5545	0.5401	0.6339	0.6238	0	0.4691	0.5986	0.5401	0.5008
PTRPH2	0.7356	0.7302	0.7487	0.6915	0.7167	0.5655	0.5903	0.6769	0.6862	0.6689	0.7278	0.532	0.7112	0.5619	0.5427	0.4691	0	0.5506	0.2992	0.47
PTRPH3	0.8294	0.8328	0.829	0.8087	0.8152	0.411	0.419	0.7581	0.6872	0.7563	0.7541	0.7302	0.6763	0.7334	0.5567	0.5986	0.5506	0	0.5632	0.542
PTRPH4	0.7674	0.7778	0.7444	0.7134	0.7501	0.5702	0.5638	0.75	0.7282	0.7718	0.7278	0.585	0.7021	0.6257	0.4787	0.5401	0.2992	0.5632	0	0.4467
PTRPH5	0.7086	0.7151	0.7311	0.6661	0.6866	0.5341	0.5894	0.6383	0.6348	0.6898	0.6816	0.6035	0.5922	0.6129	0.6209	0.5008	0.47	0.542	0.4467	0

## Sheet: venn.partitions
Control	PTRPH	DSS	PTRPL	values	count
TRUE	TRUE	TRUE	TRUE	ASV_9904, ASV_9880, ASV_9857, ASV_9812, ASV_9743, ASV_9702, ASV_9694, ASV_9686, ASV_9628, ASV_9621, ASV_9615, ASV_9508, ASV_9498, ASV_9458, ASV_9449, ASV_9428, ASV_9425, ASV_9315, ASV_9240, ASV_9233, ASV_9007, ASV_8998, ASV_8960, ASV_8939, ASV_8906, ASV_877, ASV_8694, ASV_8490, ASV_8462, ASV_8358, ASV_8343, ASV_8342, ASV_8336, ASV_8308, ASV_8249, ASV_8210, ASV_8140, ASV_8079, ASV_7975, ASV_7778, …	575
FALSE	TRUE	TRUE	TRUE	ASV_9987, ASV_9911, ASV_9910, ASV_977, ASV_9764, ASV_9739, ASV_9717, ASV_9684, ASV_9536, ASV_9529, ASV_9516, ASV_9399, ASV_9311, ASV_9310, ASV_9242, ASV_9126, ASV_9089, ASV_9071, ASV_9019, ASV_8980, ASV_8935, ASV_8902, ASV_8830, ASV_8822, ASV_8804, ASV_8747, ASV_8724, ASV_8603, ASV_8456, ASV_8379, ASV_8365, ASV_8337, ASV_8329, ASV_8328, ASV_8250, ASV_8242, ASV_8240, ASV_8110, ASV_8084, ASV_8010, …	440
TRUE	FALSE	TRUE	TRUE	ASV_9951, ASV_955, ASV_9507, ASV_9422, ASV_9069, ASV_8999, ASV_8949, ASV_8762, ASV_8454, ASV_7989, ASV_7367, ASV_7149, ASV_7052, ASV_6943, ASV_6874, ASV_6729, ASV_6546, ASV_6258, ASV_6099, ASV_6091, ASV_4372, ASV_4338, ASV_3918, ASV_3815, ASV_3809, ASV_3784, ASV_3765, ASV_3672, ASV_3562, ASV_32902, ASV_32740, ASV_32723, ASV_32719, ASV_32440, ASV_32273, ASV_32252, ASV_32118, ASV_31887, ASV_31689, …	154
FALSE	FALSE	TRUE	TRUE	ASV_9980, ASV_9937, ASV_9924, ASV_9922, ASV_9853, ASV_953, ASV_9432, ASV_9147, ASV_9132, ASV_9128, ASV_8707, ASV_870, ASV_8586, ASV_8339, ASV_8067, ASV_8048, ASV_804, ASV_7838, ASV_7834, ASV_7820, ASV_7571, ASV_7476, ASV_7263, ASV_7026, ASV_6984, ASV_6805, ASV_6748, ASV_6589, ASV_6484, ASV_590, ASV_5696, ASV_5486, ASV_5229, ASV_5216, ASV_5162, ASV_5142, ASV_4928, ASV_4921, ASV_4765, ASV_4461, ASV…	242
TRUE	TRUE	FALSE	TRUE	ASV_9887, ASV_9826, ASV_980, ASV_9741, ASV_9732, ASV_9594, ASV_9592, ASV_9589, ASV_9445, ASV_9441, ASV_9388, ASV_9286, ASV_926, ASV_9192, ASV_9127, ASV_908, ASV_9060, ASV_8982, ASV_894, ASV_8857, ASV_8729, ASV_8521, ASV_8095, ASV_799, ASV_7983, ASV_7725, ASV_7483, ASV_7443, ASV_7205, ASV_7146, ASV_7042, ASV_7040, ASV_6974, ASV_6914, ASV_6829, ASV_6807, ASV_6754, ASV_6739, ASV_6662, ASV_6658, ASV_…	351
FALSE	TRUE	FALSE	TRUE	ASV_9991, ASV_9984, ASV_9931, ASV_989, ASV_9669, ASV_9572, ASV_9502, ASV_9489, ASV_944, ASV_9410, ASV_917, ASV_9160, ASV_9146, ASV_9053, ASV_9015, ASV_8873, ASV_8861, ASV_8831, ASV_8787, ASV_8722, ASV_8718, ASV_8714, ASV_8677, ASV_8674, ASV_8596, ASV_8574, ASV_8547, ASV_851, ASV_8505, ASV_8476, ASV_8352, ASV_8246, ASV_822, ASV_8207, ASV_8198, ASV_8163, ASV_8028, ASV_7950, ASV_7936, ASV_7934, ASV_…	594
TRUE	FALSE	FALSE	TRUE	ASV_998, ASV_9905, ASV_9849, ASV_9848, ASV_9833, ASV_982, ASV_9806, ASV_9799, ASV_9500, ASV_9485, ASV_9473, ASV_9349, ASV_9334, ASV_9261, ASV_9259, ASV_9209, ASV_9164, ASV_911, ASV_9037, ASV_9016, ASV_8929, ASV_8894, ASV_8887, ASV_882, ASV_8813, ASV_8808, ASV_8785, ASV_8661, ASV_8573, ASV_8529, ASV_8503, ASV_8418, ASV_8371, ASV_8350, ASV_832, ASV_8303, ASV_8251, ASV_8215, ASV_8186, ASV_8096, ASV_…	419
FALSE	FALSE	FALSE	TRUE	ASV_9988, ASV_9967, ASV_9965, ASV_9963, ASV_9959, ASV_9956, ASV_9953, ASV_9952, ASV_9949, ASV_9943, ASV_9939, ASV_9935, ASV_9933, ASV_9926, ASV_991, ASV_9901, ASV_990, ASV_9898, ASV_9895, ASV_9892, ASV_9888, ASV_9883, ASV_9882, ASV_988, ASV_9865, ASV_9852, ASV_985, ASV_9841, ASV_9840, ASV_984, ASV_9828, ASV_9827, ASV_9825, ASV_9824, ASV_9813, ASV_9810, ASV_9803, ASV_9783, ASV_9781, ASV_9778, ASV_…	4515
TRUE	TRUE	TRUE	FALSE	ASV_9040, ASV_8821, ASV_784, ASV_664, ASV_653, ASV_6139, ASV_6103, ASV_6041, ASV_3751, ASV_3548, ASV_32772, ASV_29214, ASV_28453, ASV_25234, ASV_24445, ASV_24019, ASV_23973, ASV_21206, ASV_16794, ASV_16438, ASV_15995, ASV_15812, ASV_15701, ASV_13711, ASV_13029, ASV_11214, ASV_11, ASV_1041	28
FALSE	TRUE	TRUE	FALSE	ASV_999, ASV_9804, ASV_9579, ASV_9568, ASV_95, ASV_9468, ASV_9393, ASV_9331, ASV_9318, ASV_9250, ASV_9236, ASV_8678, ASV_782, ASV_7621, ASV_7340, ASV_7248, ASV_72, ASV_7048, ASV_6765, ASV_6683, ASV_6357, ASV_6124, ASV_6068, ASV_5746, ASV_5666, ASV_5619, ASV_5526, ASV_5500, ASV_5365, ASV_5217, ASV_5204, ASV_5150, ASV_508, ASV_496, ASV_4426, ASV_4408, ASV_4229, ASV_3678, ASV_3440, ASV_33311, ASV_33…	205
TRUE	FALSE	TRUE	FALSE	ASV_9486, ASV_942, ASV_8984, ASV_8663, ASV_8545, ASV_7999, ASV_6479, ASV_6377, ASV_6069, ASV_5777, ASV_4967, ASV_4705, ASV_4630, ASV_4570, ASV_4479, ASV_32967, ASV_32463, ASV_32061, ASV_31940, ASV_30766, ASV_29527, ASV_2937, ASV_29256, ASV_29045, ASV_28760, ASV_28692, ASV_28522, ASV_28237, ASV_27806, ASV_27469, ASV_27077, ASV_27069, ASV_2624, ASV_26218, ASV_25772, ASV_25333, ASV_24734, ASV_24306,…	69
FALSE	FALSE	TRUE	FALSE	ASV_9996, ASV_9982, ASV_993, ASV_9896, ASV_9890, ASV_9847, ASV_9815, ASV_9802, ASV_9750, ASV_9748, ASV_9735, ASV_9716, ASV_9713, ASV_9711, ASV_9708, ASV_9700, ASV_9670, ASV_9626, ASV_9595, ASV_959, ASV_9575, ASV_952, ASV_9488, ASV_9482, ASV_9478, ASV_9476, ASV_9448, ASV_9426, ASV_9408, ASV_9394, ASV_9367, ASV_9360, ASV_9355, ASV_9339, ASV_9338, ASV_9316, ASV_9314, ASV_9313, ASV_93, ASV_9287, ASV_…	1881
TRUE	TRUE	FALSE	FALSE	ASV_9934, ASV_9623, ASV_9554, ASV_9381, ASV_909, ASV_9055, ASV_8868, ASV_8607, ASV_8243, ASV_8115, ASV_7453, ASV_7288, ASV_7258, ASV_721, ASV_7102, ASV_6865, ASV_6846, ASV_6517, ASV_6100, ASV_593, ASV_572, ASV_565, ASV_5414, ASV_515, ASV_4517, ASV_4421, ASV_4269, ASV_4091, ASV_3875, ASV_3861, ASV_3768, ASV_358, ASV_3392, ASV_3367, ASV_3310, ASV_32831, ASV_32767, ASV_32738, ASV_32447, ASV_32268, A…	152
FALSE	TRUE	FALSE	FALSE	ASV_9977, ASV_9976, ASV_9966, ASV_9944, ASV_9942, ASV_9936, ASV_9932, ASV_9927, ASV_9916, ASV_9863, ASV_9862, ASV_9839, ASV_9838, ASV_9831, ASV_9829, ASV_9821, ASV_9798, ASV_9797, ASV_9795, ASV_9792, ASV_9784, ASV_9776, ASV_9767, ASV_9730, ASV_9725, ASV_9687, ASV_9681, ASV_9676, ASV_9656, ASV_9641, ASV_9638, ASV_9632, ASV_9597, ASV_9596, ASV_958, ASV_9565, ASV_9557, ASV_9548, ASV_9535, ASV_9525, …	2839
TRUE	FALSE	FALSE	FALSE	ASV_9985, ASV_9983, ASV_9972, ASV_9960, ASV_996, ASV_9948, ASV_9941, ASV_9925, ASV_9923, ASV_9921, ASV_9918, ASV_9914, ASV_9913, ASV_9912, ASV_9902, ASV_9900, ASV_99, ASV_9899, ASV_986, ASV_9855, ASV_9844, ASV_9834, ASV_9830, ASV_983, ASV_9820, ASV_9816, ASV_981, ASV_98, ASV_9791, ASV_9780, ASV_9770, ASV_9765, ASV_9762, ASV_9754, ASV_9753, ASV_9740, ASV_9733, ASV_9729, ASV_9728, ASV_9726, ASV_972…	4707

## Sheet: LEfSe analysis
Taxa	Abundace (%)	Group	LDA_score	Pvalue
Bacteria.TM7.TM7_3	3.6864	Control	3.3919	0.0249
Bacteria.Firmicutes.Bacilli.Lactobacillales.Lactobacillaceae.Lactobacillus	5.2292	Control	4.9082	0.0047
Bacteria.Firmicutes.Erysipelotrichi.Erysipelotrichales.Erysipelotrichaceae.Allobaculum	4.2438	Control	3.9288	0.0242
Bacteria.TM7.TM7_3.CW040	3.6864	Control	3.392	0.0249
Bacteria.TM7	3.6864	Control	3.3919	0.0249
Bacteria.Firmicutes.Clostridia.Clostridiales.Lachnospiraceae._Ruminococcus_	3.2733	Control	3.1139	0.0183
Bacteria.Firmicutes.Clostridia.Clostridiales.Lachnospiraceae.Coprococcus	3.4228	Control	3.4243	0.0023
Bacteria.Firmicutes.Bacilli.Lactobacillales	5.232	Control	4.8892	0.0153
Bacteria.Proteobacteria.Gammaproteobacteria.Vibrionales	2.3685	Control	3.6527	0.0188
Bacteria.Firmicutes.Bacilli.Lactobacillales.Lactobacillaceae	5.2298	Control	4.9087	0.0047
Bacteria.Proteobacteria.Gammaproteobacteria.Vibrionales.Vibrionaceae	2.3685	Control	3.6878	0.0188
Bacteria.Bacteroidetes.Bacteroidia.Bacteroidales.Rikenellaceae	4.5946	Control	4.1509	0.0364
Bacteria.Bacteroidetes.Bacteroidia.Bacteroidales.S24_7	5.5763	Control	4.9444	0.0121
Bacteria.Firmicutes.Bacilli	5.2405	Control	4.8218	0.0255
Bacteria.Proteobacteria.Gammaproteobacteria.Vibrionales.Vibrionaceae.Vibrio	2.3685	Control	3.6788	0.0188
Bacteria.TM7.TM7_3.CW040.F16	3.6864	Control	3.3922	0.0249
Bacteria.Actinobacteria.Coriobacteriia.Coriobacteriales.Coriobacteriaceae.Adlercreutzia	3.9176	Control	3.5076	0.0304
Bacteria.Proteobacteria.Gammaproteobacteria	5.257	DSS	4.9245	0.0066
Bacteria.Proteobacteria.Gammaproteobacteria.Enterobacteriales	5.2555	DSS	4.9253	0.0066
Bacteria.Firmicutes.Clostridia.Clostridiales.Lachnospiraceae.Clostridium	5.0857	DSS	4.7992	0.0105
Bacteria.Firmicutes.Erysipelotrichi.Erysipelotrichales.Erysipelotrichaceae.Clostridium	4.153	DSS	3.8677	0.0101
Bacteria.Firmicutes.Clostridia.Clostridiales.Lachnospiraceae.Blautia	4.5929	DSS	4.2936	0.0129
Bacteria.Actinobacteria.Actinobacteria.Actinomycetales.Micrococcaceae	2.2373	DSS	3.7063	0.0441
Bacteria.Firmicutes.Clostridia.Clostridiales.Lachnospiraceae	5.2455	DSS	4.852	0.0227
Bacteria.Bacteroidetes.Bacteroidia.Bacteroidales.Porphyromonadaceae.Parabacteroides	3.9669	DSS	3.7125	0.0097
Bacteria.Proteobacteria.Gammaproteobacteria.Enterobacteriales.Enterobacteriaceae	5.2555	DSS	4.9253	0.0066
Bacteria.Actinobacteria.Actinobacteria.Actinomycetales	2.6217	DSS	3.8722	0.0062
Bacteria.Proteobacteria.Gammaproteobacteria.Enterobacteriales.Enterobacteriaceae.Shigella	5.2434	DSS	4.9131	0.0066
Bacteria.Bacteroidetes.Bacteroidia.Bacteroidales.Porphyromonadaceae	3.9695	DSS	3.7142	0.0085
Bacteria.Actinobacteria.Actinobacteria	4.7216	PTRPH	4.4201	0.0036
Bacteria.Bacteroidetes.Bacteroidia.Bacteroidales.Bacteroidaceae.Bacteroides	5.145	PTRPH	4.8122	0.0071
Bacteria.Firmicutes.Bacilli.Lactobacillales.Enterococcaceae.Enterococcus	3.6499	PTRPH	3.3946	0.0132
Bacteria.Bacteroidetes.Bacteroidia.Bacteroidales.Bacteroidaceae	5.145	PTRPH	4.8122	0.0071
Bacteria.Actinobacteria.Coriobacteriia.Coriobacteriales.Coriobacteriaceae	4.6981	PTRPH	4.3505	0.0179
Bacteria.Actinobacteria.Coriobacteriia.Coriobacteriales	4.6981	PTRPH	4.3505	0.0179
Bacteria.Firmicutes.Bacilli.Lactobacillales.Enterococcaceae	3.7356	PTRPH	3.476	0.0121
Bacteria.Actinobacteria.Actinobacteria.Bifidobacteriales	4.7213	PTRPH	4.4212	0.0047
Bacteria.Actinobacteria.Coriobacteriia	4.6981	PTRPH	4.3505	0.0179
Bacteria.Actinobacteria.Actinobacteria.Bifidobacteriales.Bifidobacteriaceae	4.7213	PTRPH	4.4212	0.0047
Bacteria.Actinobacteria.Actinobacteria.Bifidobacteriales.Bifidobacteriaceae.Bifidobacterium	4.7213	PTRPH	4.4212	0.0047
Bacteria.Actinobacteria	5.0112	PTRPH	4.6753	0.0026
Bacteria.Proteobacteria.Betaproteobacteria.Rhodocyclales	2.2465	PTRPL	3.7735	0.0487
Bacteria.Firmicutes.Clostridia.Clostridiales.Peptostreptococcaceae	4.1239	PTRPL	3.7451	0.0058
Bacteria.Firmicutes.Clostridia.Clostridiales.Ruminococcaceae	4.7219	PTRPL	4.3649	0.0076
Bacteria.Proteobacteria.Betaproteobacteria.Rhodocyclales.Rhodocyclaceae	2.2465	PTRPL	3.7824	0.0487
Bacteria.Bacteroidetes.Bacteroidia.Bacteroidales.Prevotellaceae.Prevotella	4.074	PTRPL	3.7768	0.0044
Bacteria.Firmicutes.Erysipelotrichi.Erysipelotrichales.Erysipelotrichaceae.Coprobacillus	4.1923	PTRPL	3.9081	0.0118
Bacteria.Firmicutes.Bacilli.Turicibacterales	4.6879	PTRPL	4.2902	0.0087
Bacteria.Firmicutes.Clostridia.Clostridiales.Ruminococcaceae.Ruminococcus	4.4927	PTRPL	4.144	0.045
Bacteria.Firmicutes.Bacilli.Turicibacterales.Turicibacteraceae.Turicibacter	4.6879	PTRPL	4.2902	0.0087
Bacteria.Firmicutes.Clostridia.Clostridiales.Clostridiaceae.Clostridium	3.6308	PTRPL	3.2791	0.0052
Bacteria.Bacteroidetes.Bacteroidia.Bacteroidales.Prevotellaceae	4.0834	PTRPL	3.7862	0.0044
Bacteria.Firmicutes.Bacilli.Turicibacterales.Turicibacteraceae	4.6879	PTRPL	4.2902	0.0087
Bacteria.Bacteroidetes.Bacteroidia.Bacteroidales._Odoribacteraceae_	3.8458	PTRPL	3.5525	0.0189
Bacteria.Bacteroidetes.Bacteroidia.Bacteroidales._Odoribacteraceae_.Odoribacter	3.8458	PTRPL	3.5524	0.0189
Bacteria.Firmicutes.Clostridia.Clostridiales.Clostridiaceae	3.7978	PTRPL	3.4093	0.0023
