# Supplementary material for: Polysaccharide fromPleurotus tuber-regiummycelium improves DSS-induced colitis in mice by regulating inflammatory cytokines, oxidative stress and gut microbiota
Source: Royal Society of Chemistry journal article supplement (doi:10.1039/d3fo05583c), 2024-01-01
Supplement: d3fo05583c6.xlsx [file d3fo05583c6.xlsx]

## Sheet: Relative abundance of 10 types 
group	Relative abundance (%)
	Bacteroidetes	Firmicutes	Proteobacteria	Verrucomicrobia	Actinobacteria	TM7	Tenericutes	Cyanobacteria	Chlorobi	[Thermi]
Control	43.44	32.91	10	10.46	1.93	0.49	0.31	0.01	0	0
DSS	33.58	27.88	23.47	13.74	0.98	0.08	0	0.03	0	0
PTRPL	41.7	29.41	16.68	8.66	2.71	0.21	0.04	0.04	0	0
PTRPH	42.42	20.61	12.16	13.61	10.48	0.03	0	0.03	0.01	0

## Sheet: Acetic acid
number	Acetic acid concentration（µg/g）
	Control	DSS	PTRPL	PTRPH
1	2147.98	1037.23	1229.57	1219.68
2	1823.94	868.4	1343.48	1621.29
3	2081.86	896.42	1307.4	1484.25
4	2397.16	1101.25	1100.63	1501.39
5	1789.68	1108.17	1105.27	1305.92

## Sheet: Propionic acid
number	Propionic acid concentration（µg/g）
	Control	DSS	PTRPL	PTRPH
1	1359.27	899.67	1075.11	1075.12
2	1187.38	976.13	1069.11	1023.12
3	1424.05	1017.37	943.98	1049.77
4	1723.53	1006.45	987.47	1112.52
5	1378.78	892.24	957.03	1137.83

## Sheet: Butyric acid
number	Butyric acid concentration（µg/g）
	Control	DSS	PTRPL	PTRPH
1	713.45	96.47	129.16	169.85
2	638.83	78.71	122.97	162.63
3	571.05	102.33	96.06	133.09
4	779.33	89.99	98.07	136.2
5	673.51	63.7	121.83	163.37

## Sheet: Isobutyric acid
number	Isobutyric acid concentration（µg/g）
	Control	DSS	PTRPL	PTRPH
1	165.3	58.32	89.67	67.43
2	179.88	78.71	62.74	91.98
3	185.52	86.92	84.82	62.79
4	156.19	56.12	108.95	153.97
5	148.5	46.29	69.24	152.97

## Sheet: Valeric acid
number	Valeric acid concentration（µg/g）
	Control	DSS	PTRPL	PTRPH
1	335.93	218.55	196.37	314.96
2	305.43	210.01	162.99	287.92
3	305.47	220.01	261.7	256.86
4	373.18	216.52	257.64	317.7
5	376.23	210.04	156.4	255.37

## Sheet: Isovaleric acid
number	Isovaleric acid concentration（µg/g）
	Control	DSS	PTRPL	PTRPH
1	130.87	103.2	112.24	128.07
2	130.58	95.88	111.24	121.2
3	129.09	88.22	125.44	103.4
4	130.72	90.01	110.17	132.96
5	127.44	94.67	125.31	132.52

## Sheet: Total acid
number	Total acid concentration（µg/g）
	Control	DSS	PTRPL	PTRPH
1	4852.8	2413.44	2832.12	2975.1
2	4266.04	2307.83	2872.53	3308.14
3	4697.05	2411.28	2819.4	3090.16
4	5560.1	2560.34	2662.94	3354.75
5	4494.14	2415.11	2535.08	3147.98
