# Supplementary material for: Polysaccharide fromPleurotus tuber-regiummycelium improves DSS-induced colitis in mice by regulating inflammatory cytokines, oxidative stress and gut microbiota
Source: Royal Society of Chemistry journal article supplement (doi:10.1039/d3fo05583c), 2024-01-01
Supplement: d3fo05583c7.xlsx [file d3fo05583c7.xlsx]

## Sheet: Relative abundance of 10 types 
group	Relative abundance (%)
	Bacteroidetes	Firmicutes	Proteobacteria	Verrucomicrobia	Actinobacteria	TM7	Tenericutes	Cyanobacteria	Chlorobi	[Thermi]
Control	43.44	32.91	10	10.46	1.93	0.49	0.31	0.01	0	0
DSS	33.58	27.88	23.47	13.74	0.98	0.08	0	0.03	0	0
PTRPL	41.7	29.41	16.68	8.66	2.71	0.21	0.04	0.04	0	0
PTRPH	42.42	20.61	12.16	13.61	10.48	0.03	0	0.03	0.01	0

## Sheet: Correlation analysis
Sppearman’s correlation analysis between SCFAs and gut microbiota
		Acetic acid	Propionic acid	Butyric acid	Isobutyric acid	Valeric acid	Isovaleric acid	Total acid
Bacteria.Firmicutes.Bacilli.Turicibacterales.Turicibacteraceae.Turicibacter	correlation coefficient	-0.328	-0.233	-0.176	-0.18	-0.241	0.012	-0.239
	significance	0.158	0.323	0.458	0.446	0.307	0.96	0.31
Bacteria.Firmicutes.Clostridia.Clostridiales.Ruminococcaceae.Ruminococcus	correlation coefficient	0.28	0.298	0.334	0.34	-0.096	0.37	0.323
	significance	0.232	0.202	0.15	0.143	0.686	0.108	0.164
Bacteria.Bacteroidetes.Bacteroidia.Bacteroidales.Prevotellaceae.Prevotella	correlation coefficient	0.273	0.33	0.234	0.327	0.073	0.107	0.273
	significance	0.245	0.156	0.322	0.159	0.76	0.654	0.245
Bacteria.Firmicutes.Erysipelotrichi.Erysipelotrichales.Erysipelotrichaceae.Coprobacillus	correlation coefficient	-.589**	-.517*	-.471*	-.494*	-.521*	-0.182	-.568**
	significance	0.006	0.02	0.036	0.027	0.018	0.442	0.009
Bacteria.Firmicutes.Clostridia.Clostridiales.Clostridiaceae.Clostridium	correlation coefficient	-0.05	-0.054	0.024	-0.012	-0.176	0.214	-0.002
	significance	0.835	0.821	0.92	0.96	0.458	0.366	0.995
Bacteria.Bacteroidetes.Bacteroidia.Bacteroidales._Odoribacteraceae_.Odoribacter	correlation coefficient	.521*	.566**	.543*	.678**	0.359	0.43	.584**
	significance	0.018	0.009	0.013	0.001	0.12	0.058	0.007
Bacteria.Firmicutes.Bacilli.Lactobacillales.Lactobacillaceae.Lactobacillus	correlation coefficient	.462*	.656**	.695**	.648**	0.402	.541*	.556*
	significance	0.04	0.002	0.001	0.002	0.079	0.014	0.011
Bacteria.Firmicutes.Erysipelotrichi.Erysipelotrichales.Erysipelotrichaceae.Allobaculum	correlation coefficient	0.343	0.377	0.405	0.405	0.383	0.32	0.361
	significance	0.139	0.101	0.077	0.077	0.095	0.169	0.118
Bacteria.Firmicutes.Clostridia.Clostridiales.Lachnospiraceae.Ruminococcus	correlation coefficient	0.41	.452*	.522*	0.381	0.214	0.392	0.438
	significance	0.072	0.046	0.018	0.097	0.366	0.088	0.053
Bacteria.Firmicutes.Clostridia.Clostridiales.Lachnospiraceae.Coprococcus	correlation coefficient	.527*	.653**	.630**	.720**	.505*	0.348	.557*
	significance	0.017	0.002	0.003	0	0.023	0.132	0.011
Bacteria.Proteobacteria.Gammaproteobacteria.Vibrionales.Vibrionaceae.Vibrio	correlation coefficient	0.297	0.341	0.262	0.29	0.02	0.049	0.214
	significance	0.204	0.141	0.265	0.216	0.934	0.838	0.365
Bacteria.Actinobacteria.Coriobacteriia.Coriobacteriales.Coriobacteriaceae.Adlercreutzia	correlation coefficient	0.363	0.377	.469*	.472*	0.062	.463*	0.395
	significance	0.116	0.101	0.037	0.036	0.796	0.04	0.085
Bacteria.Firmicutes.Clostridia.Clostridiales.Lachnospiraceae.Clostridium	correlation coefficient	-0.405	-0.414	-.504*	-0.322	-0.234	-.504*	-.466*
	significance	0.077	0.069	0.024	0.167	0.321	0.023	0.038
Bacteria.Firmicutes.Erysipelotrichi.Erysipelotrichales.Erysipelotrichaceae.Clostridium	correlation coefficient	-.530*	-.612**	-.604**	-.574**	-0.387	-0.39	-.587**
	significance	0.016	0.004	0.005	0.008	0.092	0.089	0.007
Bacteria.Firmicutes.Clostridia.Clostridiales.Lachnospiraceae.Blautia	correlation coefficient	-.514*	-.493*	-.472*	-.508*	-0.122	-0.365	-.508*
	significance	0.02	0.027	0.036	0.022	0.609	0.113	0.022
Bacteria.Bacteroidetes.Bacteroidia.Bacteroidales.Porphyromonadaceae.Parabacteroides	correlation coefficient	-.627**	-.776**	-.809**	-.690**	-.614**	-.735**	-.746**
	significance	0.003	0	0	0.001	0.004	0	0
Bacteria.Proteobacteria.Gammaproteobacteria.Enterobacteriales.Enterobacteriaceae.Shigella	correlation coefficient	-.678**	-.758**	-.707**	-.704**	-.608**	-.522*	-.728**
	significance	0.001	0	0	0.001	0.004	0.018	0
Bacteria.Bacteroidetes.Bacteroidia.Bacteroidales.Bacteroidaceae.Bacteroides	correlation coefficient	-0.417	-.456*	-0.438	-0.429	-0.365	-0.054	-0.412
	significance	0.068	0.043	0.054	0.059	0.113	0.821	0.071
Bacteria.Firmicutes.Bacilli.Lactobacillales.Enterococcaceae.Enterococcus	correlation coefficient	-.549*	-.640**	-.628**	-.539*	-.565**	-0.432	-.594**
	significance	0.012	0.002	0.003	0.014	0.009	0.057	0.006
Bacteria.Actinobacteria.Actinobacteria.Bifidobacteriales.Bifidobacteriaceae.Bifidobacterium	correlation coefficient	-0.008	0.033	-0.002	-0.096	-0.027	0.119	0.051
	significance	0.975	0.89	0.995	0.686	0.91	0.617	0.83
Note: “*” and “**” are significant different at p < 0.05 and p < 0.01 respectively
